# Supplementary material for: The great tit abdominal stripe contains a sexually dichromatic colour patch hidden from the human eye
Source: Frontiers journal article supplement (doi:10.3389/fevo.2023.1263974), 2023-10-06
Supplement: Data_Sheet_2.xls [file Data_Sheet_2.xls]

## Sheet: brightness_UV chroma
season	ring	sex	brightness_throat	UV chroma_throat	brightness_breast	UV chroma_breast	brightness_belly	UV chroma_belly
spring	N200300	male	1.78532	1.07471	3.51419	1.2618	4.37163	1.15766
spring	N310082	male	2.98221	0.975243	4.47781	1.21324	2.38868	1.15146
spring	N317598	male	3.16633	1.00166	3.2432	1.22204	2.16188	1.11345
spring	N347539	male	4.27648	1.06305	4.1212	1.22072	3.30876	1.08851
spring	N347601	male	2.2714	1.04474	4.08094	1.126	2.51685	1.12527
winter	N347784	female	2.5655	1.06427	2.30313	1.09725	3.65889	1.0881
spring	N347845	male	3.91097	1.03327	3.83612	1.1748	3.57678	1.06526
spring	N347996	male	2.63151	0.986187	4.81475	1.10031	4.02534	1.04403
winter	N378224	female	2.94533	1.03386	1.82598	0.957663	2.20314	1.0246
spring	N378358	female	3.28236	0.990238	2.09077	1.05976	3.9778	0.99628
winter	N384052	female	2.21773	1.15467	1.97562	1.13648	3.45648	1.13927
spring	N384053	female	3.8691	1.00589	8.45967	1.09841	5.47682	1.09375
winter	N384068	female	1.36599	0.856955	0.967695	1.02146	3.05112	1.09248
spring	N384078	female	4.16691	1.05367	5.28225	1.17711	2.44467	1.0864
spring	N384087	male	2.01967	1.02755	3.75842	1.24061	2.35241	1.17067
spring	N384102	female	4.37195	0.944207	3.95327	0.961086	3.71347	1.02768
winter	N384186	female	2.65247	0.998579	2.5072	1.04796	4.38707	1.06491
winter	N384187	male	2.00277	1.14562	3.38516	1.22064	2.80238	1.17176
winter	N384188	female	2.07003	1.15038	1.78234	1.14033	3.48986	1.13746
winter	N384189	male	2.14258	1.18509	5.63338	1.21217	2.27306	1.18364
winter	N384190	female	3.16053	1.0072	3.82847	1.12601	3.20308	1.09137
winter	N384191	male	1.8626	1.12674	6.55028	1.16624	2.55109	1.23195
winter	N384192	male	1.40001	1.30957	4.76963	1.23919	2.21803	1.32805
winter	N384193	male	2.72108	1.21484	5.51221	1.28751	3.83499	1.22358
winter	N384194	male	1.36113	1.32629	4.54953	1.23707	2.40323	1.19794
winter	N384195	female	2.71876	1.08793	2.27056	1.1737	3.04373	1.171
winter	N384196	female	2.13084	1.10679	1.85587	1.16569	3.7851	1.17094
winter	N384197	male	2.2897	0.967056	6.55345	1.16745	1.95584	1.09913
winter	N384198	male	1.37627	0.875825	5.71278	1.0971	3.04937	1.09903
winter	N384199	female	2.45003	0.965874	2.25546	0.965934	2.55322	1.02565
winter	N384200	male	2.3145	1.01735	4.5724	1.3597	2.20821	1.16574
winter	N384202	female	2.09027	0.98599	2.10051	1.00226	2.15904	1.05225
spring	N384314	male	2.86433	1.09939	5.10639	1.23221	2.4687	1.15052
spring	N384345	female	4.13701	1.00233	3.13487	1.07758	3.68712	1.06299
winter	N384359	female	1.99996	1.02314	2.37517	1.20745	4.40253	1.17165
winter	N384361	male	1.10043	1.15212	2.60605	1.29893	3.11956	1.21288
spring	N384362	female	5.11016	0.908316	2.97739	0.955216	4.32921	0.940304
spring	N384364	female	4.33824	0.975672	3.64142	1.0193	3.93678	1.08524
winter	N384367	male	1.48536	1.18545	3.21111	1.24795	2.21589	1.17985
spring	N384368	female	2.61757	0.983982	3.82513	1.07084	3.46882	0.994997
spring	N384370	female	6.36721	1.03248	3.32411	1.05787	5.61276	0.968152
spring	N384379	female	4.01912	0.993537	2.81319	1.10004	2.67381	0.860843
spring	N384387	female	1.91164	0.931977	1.96313	1.05433	3.3516	1.05148
spring	N384389	female	3.73612	0.929613	2.04822	1.10117	4.83292	1.05008
spring	N384423	female	4.39701	0.977611	2.39486	1.14944	3.84536	1.07051
spring	N384478	female	3.49046	0.909192	2.56719	1.02344	3.39426	0.97841
spring	N384494	male	2.43323	1.05846	4.07221	1.18187	2.10572	1.14207
winter	N409032	female	3.18384	0.964068	1.69065	0.996704	3.34605	1.02724
winter	N409051	male	1.78006	1.15473	5.37795	1.19748	2.40842	1.22842
winter	N409052	female	2.54007	1.10897	1.69696	1.10589	2.26288	1.15711
winter	N409053	female	2.38803	1.12878	2.17919	1.17469	2.51508	1.15866
winter	N409054	male	2.38409	1.09596	4.75078	1.30612	2.80568	1.22087
winter	N409055	male	2.1262	1.15949	4.85795	1.24593	2.33373	1.26398
winter	N409056	male	1.81405	1.14958	4.42372	1.20066	2.46026	1.22674
spring	N409118	female	3.48958	0.837211	2.41468	1.01287	3.07973	1.01867
spring	N409130	female	4.35469	0.971549	2.90992	0.973273	3.19621	0.963711
winter	N409162	male	2.78147	1.05841	5.13171	1.29375	1.91187	1.05364
winter	N409198	male	1.91934	1.01098	5.05732	1.30795	2.13884	1.11345
spring	N409215	female	6.18419	0.999078	3.12846	1.05038	4.03257	1.01228
winter	N409231	male	2.27246	1.0695	3.89321	1.08401	2.72867	1.1692
spring	N409298	female	2.47596	0.88189	2.09992	1.01391	3.12744	1.02646
spring	N409455	male	1.87226	1.09656	4.061	1.18068	3.13914	1.15211
spring	N409472	male	1.98937	1.10301	3.20139	1.27636	2.64771	1.20169
winter	N409545	female	2.86194	1.13203	2.07532	1.17928	2.67698	1.17431
winter	N409574	male	1.46628	1.20311	4.49176	1.27556	2.42636	1.24965
winter	N409635	male	2.57975	1.10061	4.92244	1.2262	2.15539	1.14632
spring	N409646	female	4.6803	0.990517	3.1239	1.06385	6.28684	0.984198
winter	N409647	male	2.60171	1.03918	4.29859	1.27098	2.48848	1.14667
winter	N409651	female	2.73262	1.10969	2.23287	1.19525	3.89586	1.15001
winter	N409664	male	1.62062	1.14423	4.89042	1.17021	2.4774	1.25272
winter	N409688	male	6.78649	1.34172	2.22155	1.06341	2.28685	1.07841
winter	N409690	male	2.23839	1.05519	6.31944	1.13692	2.01159	1.03459
winter	N409691	male	2.30115	0.996379	4.80515	1.19623	2.99001	1.08268
winter	N409692	female	1.93744	0.896455	1.99837	0.894214	4.44336	1.07575
winter	N409693	female	1.73402	0.942141	1.64148	1.0106	4.57987	1.01259
winter	N409694	male	2.20802	1.08399	5.61029	1.23335	2.56827	1.13051
winter	N409695	male	1.39797	0.962402	3.02804	1.12362	2.16446	1.15062
winter	N409696	female	1.44044	1.09227	2.20003	1.01696	2.34809	1.04443
winter	N409697	male	0.808723	1.35387	3.63421	1.28729	3.32248	1.1508
winter	N409698	female	2.3761	1.09574	1.62718	1.09055	2.90581	1.15994
winter	N409699	female	1.53074	1.12346	1.70921	1.11887	2.60469	1.16681
winter	N409700	female	1.40901	1.06029	2.20896	1.08413	4.41468	1.1162
winter	N409711	male	1.61407	1.09114	4.43279	1.1917	2.62071	1.1572
winter	N409712	male	1.14011	1.26279	3.21825	1.22502	2.24708	1.25744
spring	N409743	male	2.92875	0.985066	3.70366	1.11295	2.31736	1.08069
winter	N409750	female	2.45445	1.14056	2.27971	1.22248	3.76218	1.20652
spring	N409751	male	2.94432	1.06177	2.67998	1.1158	2.85635	1.11563
winter	N409761	female	2.32494	0.989914	2.93248	0.945584	2.77908	1.07491
spring	N409787	male	1.31652	1.13504	5.73986	1.09364	2.64724	1.14076
winter	N409788	male	2.80475	1.00439	4.56167	1.0799	2.76965	1.14331
winter	N409789	male	1.57835	1.0651	2.17154	1.15876	2.9761	1.11068
winter	N409790	female	1.60511	0.884415	1.64885	0.939735	5.07862	0.99017
winter	N409791	male	2.10002	1.19954	4.36019	1.35375	2.43726	1.26652
winter	N409792	male	3.00981	1.18627	5.01343	1.37794	2.74013	1.27218
winter	N409793	male	2.24701	1.0703	4.55022	1.18324	2.8074	1.15986
winter	N409794	male	2.02152	1.1084	5.64475	1.27144	2.2667	1.16239
winter	N409795	female	1.88867	0.986025	2.14419	1.0817	1.94302	1.08918
winter	N409796	female	2.40814	0.939603	1.69865	1.05353	2.32057	1.04794
winter	N409797	male	1.36613	1.15022	3.1045	1.30349	1.72663	1.14688
winter	N409798	male	2.39974	1.05418	5.00024	1.26414	1.88928	1.25128
winter	N409799	male	1.80693	1.12712	6.07135	1.24576	2.37616	1.20396
winter	N409800	male	1.63261	1.04512	4.70094	1.18969	2.61742	1.20285
spring	N409801	female	2.63963	0.983441	2.16834	1.03292	3.27176	0.999155
spring	N409805	female	4.89377	0.951147	5.2821	1.02225	9.02034	1.12723
spring	N409806	female	3.07393	0.970566	3.36382	1.0224	4.93651	1.01055
spring	N409807	female	3.91884	1.02623	3.74345	1.03608	5.38651	1.08451
spring	N409827	female	3.65231	1.0096	2.85135	1.06327	2.47074	1.0479
spring	N409837	male	4.98788	1.07807	5.05173	1.14013	3.36525	1.10764
spring	N409850	female	4.40624	0.942196	4.29105	0.976088	5.44216	1.07427
spring	N430031	male	1.6779	1.07969	3.83832	1.19211	2.39971	1.09582
spring	N430032	male	3.66799	1.07757	5.25481	1.22221	3.34788	1.21536
winter	N430088	female	3.35624	1.11017	2.675	1.11344	3.62269	1.13689
spring	N430153	female	4.64297	0.968373	3.25949	1.02738	3.12482	1.01718
spring	N430154	female	3.61644	0.926296	3.53148	1.032	4.38025	0.919219
spring	N430198	male	3.09273	1.08279	6.55	1.16923	2.60161	1.1275
winter	N430229	male	1.7209	1.27989	3.7308	1.32787	2.63443	1.32482
winter	N430238	female	2.0499	1.00129	2.00069	1.12016	3.06985	1.14103
spring	N430268	male	2.94391	1.17383	3.43577	1.30839	2.96799	1.21189
winter	N430290	female	1.64441	1.05177	2.18618	1.09453	4.09026	1.08576
winter	N430291	female	2.0424	0.981558	2.32723	1.0068	2.45521	1.07821
winter	N430292	female	2.53034	1.01303	2.22732	1.07957	3.79286	1.09908
winter	N430293	male	1.72067	1.0936	5.98394	1.26884	3.10601	1.19003
winter	N430294	male	1.77075	1.09949	4.15057	1.20648	2.50589	1.14875
winter	N430295	male	1.81677	1.1331	4.60564	1.26392	2.33956	1.1882
winter	N430296	male	1.13433	1.23689	6.40286	1.18689	3.14257	1.18982
winter	N430297	male	2.79134	1.17054	4.63502	1.39877	3.98313	1.22171
winter	N430298	male	1.7216	1.1129	4.2521	1.24216	3.26504	1.16514
winter	N430299	male	2.19928	1.05641	3.77481	1.19296	2.20721	1.13492
winter	N430300	female	3.22852	1.03983	1.70473	1.0917	2.51464	1.1313
spring	N430301	female	3.68823	0.952495	4.31238	1.07297	4.31271	0.993406
spring	N430386	female	4.03801	0.965965	2.60478	1.03018	2.46392	1.00322
spring	N430410	male	2.39888	1.07381	4.42751	1.1226	3.06593	1.11998
spring	N430411	male	2.41851	1.088	4.00107	1.14381	3.1501	1.13812
spring	N430412	male	2.51895	1.04785	4.60947	1.14348	3.18483	1.13025
spring	N430413	female	2.78583	0.983761	2.33567	0.998865	4.1379	1.02628
spring	N430443	male	2.84116	1.05683	2.09562	1.06228	2.30054	1.04928
spring	N430444	male	2.42809	1.02136	3.58353	1.1252	4.57559	1.11522
spring	N430445	male	1.94696	1.02658	3.70405	1.20891	4.23284	1.12111
spring	N461019	male	4.18973	1.0515	3.02425	1.12736	2.70693	1.12193
spring	N461061	female	4.99505	0.88322	4.78198	1.01623	3.51048	0.999455
spring	N461062	male	3.72754	1.04587	3.09375	1.12448	2.63488	1.1498
spring	N461106	male	2.91401	1.1343	4.62003	1.14093	3.80722	1.10514
spring	N461116	female	3.55296	0.955141	2.08915	1.02116	3.57462	0.917346
spring	N461117	male	4.47255	1.07354	2.51871	1.18332	2.82089	1.11209
spring	N461119	female	2.5633	0.942265	2.3518	0.930599	2.68616	0.911418
spring	N461121	male	2.22266	1.06728	4.20587	1.24254	3.0357	1.06667
spring	N461122	female	4.14619	0.915591	3.22596	1.01505	4.12223	1.00432

## Sheet: cone catch
season	ring	sex	stripe area	measure repeat	u	s	m	l	lum
winter	N409688	male	throat	1	0.0774155	0.0737405	0.0572072	0.0468085	1917.5
winter	N409688	male	throat	2	0.0708932	0.0691776	0.0531859	0.0426293	1776.28
winter	N409231	male	throat	1	0.0198153	0.0195856	0.020856	0.0204092	636.995
winter	N409231	male	throat	2	0.0187552	0.0212059	0.0219865	0.0214162	668.408
winter	N409198	male	throat	1	0.0182703	0.0203284	0.0200552	0.0193508	620.674
winter	N409198	male	throat	2	0.0138308	0.0162043	0.0156394	0.0155272	489.855
winter	N409690	male	throat	1	0.0197824	0.0224917	0.0206677	0.0192238	649.875
winter	N409690	male	throat	2	0.0188738	0.0199907	0.0200137	0.0211149	635.831
winter	N409691	male	throat	1	0.0232883	0.0270289	0.0250916	0.0236425	786.909
winter	N409691	male	throat	2	0.0159262	0.0188437	0.018291	0.0175204	565.107
winter	N409162	male	throat	1	0.0277167	0.0289661	0.0287589	0.03082	922.304
winter	N409162	male	throat	2	0.0206806	0.0237101	0.0207343	0.0192533	664.706
winter	N409788	male	throat	1	0.0260385	0.0290489	0.0307001	0.0312495	940.418
winter	N409788	male	throat	2	0.0196387	0.0213209	0.0219729	0.0218962	676.774
winter	N409635	male	throat	1	0.0218942	0.0222922	0.0232633	0.0241569	726.863
winter	N409635	male	throat	2	0.0220577	0.0221067	0.0231508	0.0239057	722.298
winter	N409694	male	throat	1	0.0199626	0.0203211	0.0209446	0.0207361	647.992
winter	N409694	male	throat	2	0.0175935	0.0191032	0.0193728	0.0196196	603.304
winter	N409789	male	throat	1	0.0089773	0.00925566	0.00964512	0.00982615	299.365
winter	N409789	male	throat	2	0.0172553	0.0184568	0.0189566	0.0190484	586.964
winter	N409647	male	throat	1	0.020053	0.021788	0.0227495	0.0227388	697.84
winter	N409647	male	throat	2	0.0223263	0.0248223	0.026034	0.0248571	784.579
winter	N409695	male	throat	1	0.0110479	0.0121241	0.013074	0.0130272	395.512
winter	N409695	male	throat	2	0.0110874	0.0132488	0.0137836	0.0141271	422.95
winter	N409697	male	throat	1	0.011029	0.00959861	0.00953558	0.0101478	311.271
winter	N409697	male	throat	2	0.00482582	0.00426255	0.00368128	0.0034908	123.047
winter	N430293	male	throat	1	0.0173475	0.0194091	0.0184601	0.017108	572.719
winter	N430293	male	throat	2	0.0126266	0.0141913	0.013929	0.0122852	420.683
winter	N430294	male	throat	1	0.0147432	0.0159017	0.0175626	0.0155623	509.359
winter	N430294	male	throat	2	0.0153713	0.0154408	0.0165993	0.0157624	499.808
winter	N430295	male	throat	1	0.0120831	0.0117895	0.0129214	0.0127296	391.72
winter	N430295	male	throat	2	0.0189046	0.0191383	0.0201667	0.0192624	612.438
winter	N384361	male	throat	1	0.0125686	0.0132371	0.0146276	0.0146985	441.441
winter	N384361	male	throat	2	0.00510743	0.0052194	0.00596708	0.00546581	173.426
winter	N430296	male	throat	1	0.00975173	0.00985251	0.0104688	0.0107144	323.688
winter	N430296	male	throat	2	0.00918817	0.00870017	0.00933596	0.00933265	287.459
winter	N409711	male	throat	1	0.0128542	0.0146424	0.0147882	0.014105	450.954
winter	N409711	male	throat	2	0.0132176	0.0148238	0.0155961	0.0148063	468.277
winter	N430297	male	throat	1	0.0252125	0.026824	0.0265243	0.0243528	812.223
winter	N430297	male	throat	2	0.0234681	0.0234511	0.0236738	0.023214	737.672
winter	N430298	male	throat	1	0.0107461	0.0122657	0.0128949	0.0126895	390.843
winter	N430298	male	throat	2	0.0171181	0.0183611	0.0191069	0.0185139	582.103
winter	N430299	male	throat	1	0.0200605	0.0204241	0.0225152	0.0219679	676.159
winter	N430299	male	throat	2	0.0158139	0.0175231	0.0193619	0.0189126	576.47
winter	N384187	male	throat	1	0.0109564	0.0111569	0.011761	0.0110768	355.426
winter	N384187	male	throat	2	0.0237265	0.0242672	0.0244955	0.0246172	767.03
winter	N409664	male	throat	1	0.0109526	0.0112367	0.0118794	0.0112974	359.354
winter	N409664	male	throat	2	0.0170694	0.0164671	0.0176936	0.0170003	537.001
winter	N409574	male	throat	1	0.0105824	0.0103171	0.0107511	0.00992294	325.965
winter	N409574	male	throat	2	0.0151231	0.0155061	0.0160084	0.0148668	485.375
winter	N384189	male	throat	1	0.0208039	0.0210509	0.0223256	0.0211305	674.545
winter	N384189	male	throat	2	0.0165718	0.0159128	0.0168848	0.0166021	518.729
winter	N384191	male	throat	1	0.0165852	0.0160156	0.0170078	0.0170488	525.087
winter	N384191	male	throat	2	0.0150364	0.0159513	0.0174678	0.0164841	518.509
winter	N384192	male	throat	1	0.00957419	0.00881506	0.0088239	0.00727721	265.49
winter	N384192	male	throat	2	0.0170356	0.0165615	0.0166806	0.0143779	503.218
winter	N384193	male	throat	1	0.0271865	0.0288653	0.0284311	0.0242813	855.069
winter	N384193	male	throat	2	0.0219904	0.0218634	0.0218428	0.0194738	665.525
winter	N384194	male	throat	1	0.0128102	0.0116894	0.0121168	0.011613	374.923
winter	N384194	male	throat	2	0.012612	0.0112201	0.0122245	0.0105372	361.026
winter	N430229	male	throat	1	0.0174244	0.0162333	0.016158	0.0155479	507.459
winter	N430229	male	throat	2	0.0146456	0.01359	0.0135811	0.0128647	424.134
winter	N384197	male	throat	1	0.0179817	0.0198627	0.0219377	0.0220833	659.592
winter	N384197	male	throat	2	0.0179705	0.0211445	0.0228921	0.0228404	687.441
winter	N384198	male	throat	1	0.00676081	0.00849436	0.0102538	0.0105577	297.932
winter	N384198	male	throat	2	0.013775	0.0169476	0.0177144	0.0169767	530.2
winter	N384200	male	throat	1	0.0202481	0.0226907	0.0228907	0.0218456	699.559
winter	N384200	male	throat	2	0.0187197	0.0214517	0.0213594	0.0204725	655.497
winter	N409791	male	throat	1	0.0200035	0.018654	0.018922	0.019022	597.376
winter	N409791	male	throat	2	0.0178228	0.0180214	0.0187402	0.0181058	574.023
winter	N409792	male	throat	1	0.0259384	0.0258848	0.0266101	0.0256612	819.389
winter	N409792	male	throat	2	0.0275431	0.0275062	0.02749	0.0260822	851.82
winter	N409793	male	throat	1	0.0159534	0.016291	0.0178047	0.0178197	540.451
winter	N409793	male	throat	2	0.0209287	0.0239501	0.0237692	0.0222579	725.556
winter	N409794	male	throat	1	0.015894	0.0173508	0.017652	0.0155299	526.74
winter	N409794	male	throat	2	0.0185352	0.0207922	0.0213704	0.0193215	638.294
winter	N409797	male	throat	1	0.0126237	0.0128137	0.013395	0.013235	412.058
winter	N409797	male	throat	2	0.0105415	0.0112831	0.0118604	0.0109654	355.086
winter	N409798	male	throat	1	0.0211022	0.0226033	0.0233997	0.0222944	710.838
winter	N409798	male	throat	2	0.0186312	0.020983	0.0218784	0.0212339	663.233
winter	N409799	male	throat	1	0.0130626	0.0134653	0.0133519	0.012353	410.657
winter	N409799	male	throat	2	0.0175941	0.0190935	0.020014	0.0198044	611.225
winter	N384367	male	throat	1	0.0108108	0.0101042	0.0106939	0.0102018	326.889
winter	N384367	male	throat	2	0.0144332	0.0151456	0.0161396	0.0158598	490.437
winter	N409800	male	throat	1	0.0132052	0.0141298	0.0155283	0.0149701	462.911
winter	N409800	male	throat	2	0.0133501	0.0149414	0.015789	0.0151043	474.456
winter	N409051	male	throat	1	0.0120357	0.0123336	0.0131606	0.0133752	404.816
winter	N409051	male	throat	2	0.0168559	0.018231	0.0186485	0.0195405	585.208
winter	N409712	male	throat	1	0.0103237	0.00999114	0.0106465	0.0112553	333.662
winter	N409712	male	throat	2	0.00864729	0.00842553	0.00862382	0.00940434	276.895
winter	N409054	male	throat	1	0.0165164	0.018185	0.0188291	0.0189356	579.748
winter	N409054	male	throat	2	0.0224756	0.0236078	0.0247567	0.0255879	768.598
winter	N409055	male	throat	1	0.0156283	0.0163223	0.0163511	0.0155555	504.177
winter	N409055	male	throat	2	0.0206819	0.023345	0.0223571	0.0204848	688.875
winter	N409056	male	throat	1	0.0162997	0.0163588	0.0182059	0.020033	566.909
winter	N409056	male	throat	2	0.0130532	0.0130264	0.0133921	0.0143065	425.426
winter	N409688	male	breast	1	0.0160041	0.0197096	0.0175244	0.0157124	548.642
winter	N409688	male	breast	2	0.0240711	0.0257575	0.0239418	0.0211782	743.818
winter	N409231	male	breast	1	0.0314264	0.0359657	0.0328102	0.0282004	1012.34
winter	N409231	male	breast	2	0.0387553	0.0448126	0.0405151	0.0347154	1252.47
winter	N409198	male	breast	1	0.0437748	0.0457242	0.0358312	0.0290472	1178.49
winter	N409198	male	breast	2	0.0647337	0.0620543	0.0473112	0.0386896	1597.53
winter	N409690	male	breast	1	0.0615092	0.0698851	0.059226	0.0480162	1860.67
winter	N409690	male	breast	2	0.0599116	0.0667192	0.0569573	0.0461927	1787.73
winter	N409691	male	breast	1	0.0450145	0.0482375	0.0416979	0.0352763	1320.93
winter	N409691	male	breast	2	0.0498334	0.0518967	0.0439266	0.0357056	1395.63
winter	N409162	male	breast	1	0.0527461	0.053176	0.0419646	0.0332179	1374.32
winter	N409162	male	breast	2	0.0568256	0.0564245	0.0440645	0.0356533	1460.43
winter	N409788	male	breast	1	0.039652	0.0429881	0.0380023	0.0321043	1190.11
winter	N409788	male	breast	2	0.0437946	0.0530793	0.0469319	0.0403096	1458.48
winter	N409635	male	breast	1	0.032455	0.0338059	0.0308298	0.0257905	954.524
winter	N409635	male	breast	2	0.0663346	0.0673518	0.0563304	0.0463785	1810.58
winter	N409694	male	breast	1	0.0596901	0.063458	0.0517631	0.0419696	1667.43
winter	N409694	male	breast	2	0.0525877	0.0548076	0.0454415	0.0378973	1466.27
winter	N409789	male	breast	1	0.0207453	0.0216617	0.0199036	0.0180123	626.86
winter	N409789	male	breast	2	0.0198478	0.0211447	0.0189793	0.0166568	597.468
winter	N409647	male	breast	1	0.0411779	0.0393073	0.0328284	0.0267519	1061.55
winter	N409647	male	breast	2	0.0469301	0.0491244	0.0417674	0.0339989	1323.98
winter	N409695	male	breast	1	0.0235998	0.0254415	0.0244361	0.0213244	745.618
winter	N409695	male	breast	2	0.031418	0.0350803	0.0316558	0.0268352	980.3
winter	N409697	male	breast	1	0.0379187	0.0381237	0.0319107	0.0271852	1035.11
winter	N409697	male	breast	2	0.0356338	0.0347814	0.0292237	0.0252731	953.358
winter	N430293	male	breast	1	0.0551018	0.056042	0.0469496	0.0385623	1506.73
winter	N430293	male	breast	2	0.0667598	0.0679404	0.0562514	0.0470326	1822.63
winter	N430294	male	breast	1	0.0382524	0.0390706	0.034894	0.0298148	1098.54
winter	N430294	male	breast	2	0.0407154	0.0424313	0.0392136	0.0337812	1216.29
winter	N430295	male	breast	1	0.0408668	0.0413439	0.0350858	0.0284372	1116.58
winter	N430295	male	breast	2	0.0530429	0.0537514	0.0450271	0.0361255	1437.69
winter	N384361	male	breast	1	0.0230731	0.022864	0.0204849	0.0164235	636.201
winter	N384361	male	breast	2	0.0286356	0.0286965	0.0251031	0.0209127	794.278
winter	N430296	male	breast	1	0.0639304	0.0692201	0.0600735	0.0491618	1881.91
winter	N430296	male	breast	2	0.0574576	0.0628013	0.0552274	0.0465685	1731.09
winter	N409711	male	breast	1	0.0352815	0.0377002	0.0338921	0.0285782	1054.91
winter	N409711	male	breast	2	0.0481122	0.0530304	0.0462481	0.0381953	1446.03
winter	N430297	male	breast	1	0.0442159	0.0404469	0.0332746	0.02766	1094.82
winter	N430297	male	breast	2	0.0559843	0.0512236	0.0409869	0.0350043	1374.96
winter	N430298	male	breast	1	0.0356699	0.0373591	0.0336636	0.0278606	1044.2
winter	N430298	male	breast	2	0.0468194	0.0483789	0.0422449	0.0348185	1329.31
winter	N430299	male	breast	1	0.0339727	0.0356283	0.0324223	0.0265425	998.531
winter	N430299	male	breast	2	0.0376982	0.0413618	0.0364279	0.0306749	1140.21
winter	N384187	male	breast	1	0.0311039	0.0308421	0.0283871	0.0249025	891.288
winter	N384187	male	breast	2	0.0345339	0.0367106	0.0325195	0.027226	1017.45
winter	N409664	male	breast	1	0.038794	0.0419708	0.0389581	0.0325598	1191.76
winter	N409664	male	breast	2	0.0515833	0.0563389	0.0507903	0.0433564	1580.1
winter	N409574	male	breast	1	0.035581	0.0354265	0.031287	0.025193	978.371
winter	N409574	male	breast	2	0.0551538	0.056005	0.0473914	0.0390529	1515.5
winter	N384189	male	breast	1	0.0453727	0.0480465	0.0425976	0.0345964	1322.84
winter	N384189	male	breast	2	0.064628	0.0689963	0.0584288	0.0475999	1851.51
winter	N384191	male	breast	1	0.0575704	0.0655365	0.058154	0.048636	1803.92
winter	N384191	male	breast	2	0.0671955	0.0731797	0.0603385	0.0486435	1925.98
winter	N384192	male	breast	1	0.0477556	0.0487819	0.0415705	0.0334804	1316.91
winter	N384192	male	breast	2	0.0468635	0.0495482	0.0434087	0.035541	1358.06
winter	N384193	male	breast	1	0.0521462	0.0533211	0.045504	0.0376417	1449.72
winter	N384193	male	breast	2	0.0592229	0.0592148	0.0501705	0.041098	1604.21
winter	N384194	male	breast	1	0.0391168	0.0399803	0.0335007	0.0268285	1067.92
winter	N384194	male	breast	2	0.0508453	0.0539008	0.0475604	0.0391127	1484.44
winter	N430229	male	breast	1	0.0452631	0.0440623	0.0374426	0.0300021	1193.37
winter	N430229	male	breast	2	0.0326446	0.0317073	0.027285	0.0215173	861.655
winter	N384197	male	breast	1	0.0601773	0.0661349	0.0555493	0.0456657	1764.69
winter	N384197	male	breast	2	0.0675921	0.0743539	0.0609895	0.0498067	1955.08
winter	N384198	male	breast	1	0.0580259	0.0687195	0.0598268	0.0498419	1861.56
winter	N384198	male	breast	2	0.0454645	0.0522886	0.0466379	0.0388474	1440.44
winter	N384200	male	breast	1	0.0512526	0.0478088	0.0383195	0.0306275	1261.41
winter	N384200	male	breast	2	0.0477281	0.0459308	0.0380931	0.0307456	1231.68
winter	N409791	male	breast	1	0.0551507	0.0535245	0.0459747	0.0379256	1468.9
winter	N409791	male	breast	2	0.0368954	0.0337999	0.0266004	0.0222984	895.266
winter	N409792	male	breast	1	0.0588743	0.0554065	0.0462196	0.037596	1497.53
winter	N409792	male	breast	2	0.0489345	0.0451428	0.0379086	0.0306651	1226.14
winter	N409793	male	breast	1	0.0535974	0.0559654	0.0482606	0.0397381	1524.84
winter	N409793	male	breast	2	0.0344289	0.0373067	0.0345097	0.029074	1059.22
winter	N409794	male	breast	1	0.0444965	0.0465836	0.0388944	0.0308068	1235.06
winter	N409794	male	breast	2	0.0705716	0.0724481	0.0589283	0.0472984	1904.38
winter	N409797	male	breast	1	0.0177643	0.0181317	0.015724	0.0120611	488.598
winter	N409797	male	breast	2	0.0467856	0.045678	0.0373356	0.0310126	1221.35
winter	N409798	male	breast	1	0.0415829	0.0426045	0.034492	0.0280386	1120.7
winter	N409798	male	breast	2	0.0604996	0.0624406	0.0516516	0.042075	1660.97
winter	N409799	male	breast	1	0.0503904	0.052962	0.0445556	0.0364726	1420.36
winter	N409799	male	breast	2	0.0716947	0.0741042	0.0616656	0.0507101	1981.73
winter	N384367	male	breast	1	0.022608	0.0244268	0.0217725	0.0176793	672.971
winter	N384367	male	breast	2	0.0407131	0.0421727	0.0361055	0.0292614	1141.17
winter	N409800	male	breast	1	0.0550668	0.0587198	0.0506728	0.0434079	1612.41
winter	N409800	male	breast	2	0.0364968	0.0376374	0.0328521	0.0273901	1037.12
winter	N409051	male	breast	1	0.0512887	0.0568121	0.0516645	0.0454471	1611.5
winter	N409051	male	breast	2	0.0494282	0.0501249	0.0432919	0.0374643	1388.74
winter	N409712	male	breast	1	0.0283157	0.0295875	0.0265008	0.023297	837.199
winter	N409712	male	breast	2	0.0317953	0.0337463	0.0305348	0.0269918	960.159
winter	N409054	male	breast	1	0.0491205	0.048117	0.0414869	0.0349949	1328.95
winter	N409054	male	breast	2	0.04532	0.0446226	0.0395884	0.0353734	1269.95
winter	N409055	male	breast	1	0.0518126	0.054155	0.0452275	0.0381277	1457.9
winter	N409055	male	breast	2	0.0433348	0.045414	0.0383597	0.0333594	1239.43
winter	N409056	male	breast	1	0.03987	0.0417595	0.0369922	0.0327347	1175.91
winter	N409056	male	breast	2	0.0424253	0.0459044	0.0404617	0.0361654	1287.64
winter	N409688	male	belly	1	0.0227046	0.0248577	0.0232309	0.0214797	727.065
winter	N409688	male	belly	2	0.0180327	0.0197246	0.0190925	0.0177064	589.638
winter	N409231	male	belly	1	0.0251434	0.0255823	0.0258149	0.0254366	804.131
winter	N409231	male	belly	2	0.0242892	0.0232622	0.02293	0.0223293	723.169
winter	N409198	male	belly	1	0.0205895	0.020578	0.0209628	0.0201425	647.002
winter	N409198	male	belly	2	0.0176461	0.0187827	0.0181541	0.017854	572.133
winter	N409690	male	belly	1	0.0164946	0.0183235	0.0183633	0.0171334	559.447
winter	N409690	male	belly	2	0.0187973	0.0202794	0.0201097	0.0189008	618.319
winter	N409691	male	belly	1	0.0283607	0.0296807	0.0297774	0.0294332	927.801
winter	N409691	male	belly	2	0.0232372	0.0249052	0.0254765	0.0251091	785.294
winter	N409162	male	belly	1	0.0174743	0.0197344	0.0193396	0.0182361	595.235
winter	N409162	male	belly	2	0.0155328	0.0170039	0.0164012	0.0160297	514.883
winter	N409788	male	belly	1	0.026817	0.0277683	0.0267896	0.0264919	848.714
winter	N409788	male	belly	2	0.0233978	0.0230781	0.0218412	0.021312	698.335
winter	N409635	male	belly	1	0.0207877	0.0209857	0.0205507	0.0198084	644.144
winter	N409635	male	belly	2	0.0190404	0.0195042	0.01877	0.017034	581.594
winter	N409694	male	belly	1	0.0229862	0.0243987	0.0245586	0.0237556	758.25
winter	N409694	male	belly	2	0.021886	0.0224255	0.0225879	0.0214404	695.933
winter	N409789	male	belly	1	0.021222	0.0221758	0.0228294	0.022122	700.227
winter	N409789	male	belly	2	0.0299288	0.0301214	0.0308463	0.0309444	961.641
winter	N409647	male	belly	1	0.0200941	0.0206656	0.0217865	0.0212487	664.555
winter	N409647	male	belly	2	0.0230378	0.0229057	0.0233846	0.0227684	724.345
winter	N409695	male	belly	1	0.0207019	0.0216338	0.0210803	0.0192709	649.782
winter	N409695	male	belly	2	0.0179212	0.0187306	0.0187459	0.01694	569.805
winter	N409697	male	belly	1	0.0291203	0.0293105	0.0299136	0.0306208	939.523
winter	N409697	male	belly	2	0.0284847	0.0285313	0.028715	0.0297132	910.188
winter	N430293	male	belly	1	0.0309548	0.0300694	0.0304464	0.0298166	950.132
winter	N430293	male	belly	2	0.0252549	0.0244161	0.0245963	0.0248995	777.132
winter	N430294	male	belly	1	0.0228981	0.0231436	0.0235352	0.021346	714.128
winter	N430294	male	belly	2	0.0214929	0.0218759	0.0226305	0.0219652	695.042
winter	N430295	male	belly	1	0.0210604	0.0197662	0.0209751	0.0206811	646.508
winter	N430295	male	belly	2	0.0210316	0.0202794	0.0213948	0.0198578	647.375
winter	N384361	male	belly	1	0.0257887	0.0254429	0.0266737	0.0261475	820.124
winter	N384361	male	belly	2	0.0286289	0.0276194	0.0286344	0.0286869	892.111
winter	N430296	male	belly	1	0.0258348	0.0265162	0.0266875	0.0246221	815.687
winter	N430296	male	belly	2	0.0302707	0.0303693	0.0300857	0.0281418	931.271
winter	N409711	male	belly	1	0.0193417	0.0202583	0.0218416	0.0210899	657.437
winter	N409711	male	belly	2	0.0251253	0.0240973	0.0268802	0.0264681	810.903
winter	N430297	male	belly	1	0.0327585	0.032683	0.0322176	0.031053	1008.46
winter	N430297	male	belly	2	0.0397101	0.0383227	0.0376311	0.0364917	1186.17
winter	N430298	male	belly	1	0.0272763	0.0275782	0.0287672	0.028746	889.051
winter	N430298	male	belly	2	0.0282086	0.0274836	0.0305332	0.0305365	925.41
winter	N430299	male	belly	1	0.0213997	0.0227069	0.0223138	0.0206718	686.92
winter	N430299	male	belly	2	0.0175095	0.0187443	0.0188757	0.0173489	573.65
winter	N384187	male	belly	1	0.0288624	0.028453	0.0287605	0.028892	903.499
winter	N384187	male	belly	2	0.0218649	0.0214408	0.0220181	0.0197832	665.946
winter	N409664	male	belly	1	0.0249721	0.0229507	0.0242318	0.023149	743.105
winter	N409664	male	belly	2	0.0205902	0.0202465	0.0200088	0.0186405	620.622
winter	N409574	male	belly	1	0.023135	0.0216946	0.0219251	0.0208012	681.124
winter	N409574	male	belly	2	0.0217281	0.0208653	0.0215899	0.019706	655.434
winter	N384189	male	belly	1	0.0215327	0.0211848	0.021732	0.0207084	668.426
winter	N384189	male	belly	2	0.0192119	0.0192651	0.0202669	0.0183064	606.613
winter	N384191	male	belly	1	0.0239855	0.0241517	0.023275	0.0196881	708.686
winter	N384191	male	belly	2	0.0240219	0.0242897	0.023938	0.0208115	727.066
winter	N384192	male	belly	1	0.022414	0.0209034	0.0203017	0.0176498	626.189
winter	N384192	male	belly	2	0.0214401	0.0197236	0.0195986	0.0161911	591.816
winter	N384193	male	belly	1	0.0339116	0.0305951	0.0325629	0.0318497	1004.54
winter	N384193	male	belly	2	0.0353323	0.033464	0.0362326	0.0358701	1108.55
winter	N384194	male	belly	1	0.0214762	0.0216985	0.0218234	0.020291	669.801
winter	N384194	male	belly	2	0.0219951	0.0212414	0.0221732	0.0209297	676.876
winter	N430229	male	belly	1	0.0232196	0.0202036	0.0209339	0.0191618	643.015
winter	N430229	male	belly	2	0.0271802	0.0251621	0.0253863	0.0236346	786.126
winter	N384197	male	belly	1	0.018271	0.0203647	0.0198415	0.0177202	603.611
winter	N384197	male	belly	2	0.0161426	0.0176865	0.0175194	0.0157096	530.962
winter	N384198	male	belly	1	0.0259033	0.0270931	0.0284931	0.0277953	868.502
winter	N384198	male	belly	2	0.0260156	0.0268917	0.0282128	0.0278106	864.483
winter	N384200	male	belly	1	0.0200454	0.0209259	0.0202889	0.0184448	625.762
winter	N384200	male	belly	2	0.0208277	0.0209952	0.0204063	0.0182551	628.379
winter	N409791	male	belly	1	0.0245031	0.022369	0.0230866	0.0220377	714.706
winter	N409791	male	belly	2	0.0207539	0.0198536	0.0205018	0.0191967	627.703
winter	N409792	male	belly	1	0.0219407	0.0204979	0.0204833	0.0194778	639.903
winter	N409792	male	belly	2	0.030013	0.0278948	0.0281904	0.0261561	871.136
winter	N409793	male	belly	1	0.0251259	0.0252279	0.0260754	0.0260291	809.014
winter	N409793	male	belly	2	0.0246497	0.0251423	0.0248425	0.023272	768.722
winter	N409794	male	belly	1	0.0205514	0.0208338	0.0199188	0.0178835	617.754
winter	N409794	male	belly	2	0.0204659	0.0225468	0.0218544	0.019268	664.687
winter	N409797	male	belly	1	0.0146028	0.0160292	0.0160005	0.0144019	483.86
winter	N409797	male	belly	2	0.0157939	0.0167625	0.016744	0.0150996	508.231
winter	N409798	male	belly	1	0.0177082	0.0181663	0.0172717	0.0160574	541.35
winter	N409798	male	belly	2	0.0172392	0.0171957	0.0171403	0.0147674	517.717
winter	N409799	male	belly	1	0.0195446	0.0195738	0.0198215	0.0184094	607.099
winter	N409799	male	belly	2	0.0230081	0.0226559	0.0230219	0.0219435	710.726
winter	N384367	male	belly	1	0.0199103	0.0205258	0.0202235	0.0197181	633.041
winter	N384367	male	belly	2	0.0189339	0.0194737	0.0195011	0.0186729	603.491
winter	N409800	male	belly	1	0.0245781	0.0243708	0.0244543	0.0220826	746.635
winter	N409800	male	belly	2	0.0235952	0.023756	0.0229749	0.0208058	711.393
winter	N409051	male	belly	1	0.020305	0.0213522	0.021187	0.0208242	661.55
winter	N409051	male	belly	2	0.0234818	0.0225361	0.0208418	0.0199039	670.791
winter	N409712	male	belly	1	0.020201	0.0198384	0.0195749	0.019431	618.841
winter	N409712	male	belly	2	0.0203152	0.018866	0.0192424	0.019643	609.278
winter	N409054	male	belly	1	0.0292854	0.0285782	0.0282137	0.0270651	883.551
winter	N409054	male	belly	2	0.0211465	0.0216879	0.0209803	0.0204814	662.138
winter	N409055	male	belly	1	0.0214683	0.0204492	0.0205998	0.0200002	643.921
winter	N409055	male	belly	2	0.020424	0.0197298	0.0201409	0.0198238	627.842
winter	N409056	male	belly	1	0.0228661	0.0229819	0.0228252	0.0213915	706.058
winter	N409056	male	belly	2	0.0208738	0.0195	0.0207018	0.0206389	640.434
winter	N409032	female	throat	1	0.0244285	0.0272293	0.0292325	0.0309487	901.579
winter	N409032	female	throat	2	0.0249666	0.0279947	0.0294002	0.0325108	926.519
winter	N409692	female	throat	1	0.0149653	0.0180754	0.0197773	0.0209645	601.864
winter	N409692	female	throat	2	0.0139481	0.0158695	0.0167537	0.0185649	526.657
winter	N409693	female	throat	1	0.0128474	0.0143983	0.0155602	0.0170388	483.827
winter	N409693	female	throat	2	0.0139661	0.0153103	0.016792	0.0183908	520.464
winter	N409761	female	throat	1	0.0180932	0.0199122	0.021857	0.023696	674.751
winter	N409761	female	throat	2	0.0179289	0.0190325	0.0211958	0.0221175	645.066
winter	N384068	female	throat	1	0.0102634	0.0120986	0.0141197	0.0142142	414.013
winter	N384068	female	throat	2	0.00949206	0.0116223	0.0136106	0.0138598	398.862
winter	N409696	female	throat	1	0.0119221	0.0120351	0.0123927	0.0135023	395.45
winter	N409696	female	throat	2	0.0115366	0.0119503	0.0121662	0.0143463	399.1
winter	N347784	female	throat	1	0.0211024	0.0225011	0.0237404	0.025656	744.797
winter	N347784	female	throat	2	0.0202184	0.0206174	0.0222156	0.0239239	693.838
winter	N409698	female	throat	1	0.0238629	0.0241661	0.0251828	0.0271888	797.435
winter	N409698	female	throat	2	0.0150756	0.0156795	0.0162156	0.0183079	521.075
winter	N409699	female	throat	1	0.0139268	0.0137567	0.0146043	0.0161581	464.113
winter	N409699	female	throat	2	0.0116144	0.0116466	0.0125986	0.0132575	390.664
winter	N409700	female	throat	1	0.0103374	0.0100623	0.0110032	0.0113235	338.473
winter	N409700	female	throat	2	0.0133216	0.0134607	0.0145604	0.016127	458.713
winter	N430290	female	throat	1	0.0128611	0.0138915	0.0148273	0.0159006	461.499
winter	N430290	female	throat	2	0.0135787	0.0139371	0.0161495	0.0158102	476.402
winter	N378224	female	throat	1	0.0226062	0.0248775	0.0268464	0.0294298	836.861
winter	N378224	female	throat	2	0.0231764	0.0239231	0.0263432	0.0293935	824.991
winter	N430291	female	throat	1	0.0138052	0.0151581	0.0167613	0.0187607	521.735
winter	N430291	female	throat	2	0.016967	0.0187682	0.0204804	0.0229544	640.326
winter	N430292	female	throat	1	0.0161503	0.0166886	0.0186644	0.0208717	581.706
winter	N430292	female	throat	2	0.0237649	0.0254448	0.0274836	0.0293033	850.868
winter	N384186	female	throat	1	0.0171262	0.0172162	0.0200888	0.0211273	606.028
winter	N384186	female	throat	2	0.0243515	0.0261626	0.0293611	0.0311799	895.22
winter	N430088	female	throat	1	0.0266493	0.0266582	0.0292024	0.030767	901.943
winter	N430088	female	throat	2	0.0279109	0.0285861	0.0314544	0.0331645	967.924
winter	N430238	female	throat	1	0.0133131	0.0141497	0.0154756	0.0156761	469.559
winter	N430238	female	throat	2	0.0192018	0.0211608	0.0228052	0.0238984	700.802
winter	N430300	female	throat	1	0.0253264	0.0262709	0.028914	0.0319257	902.089
winter	N430300	female	throat	2	0.0255003	0.0263718	0.0291246	0.03183	904.736
winter	N384188	female	throat	1	0.0168809	0.0170413	0.0185987	0.01891	568.263
winter	N384188	female	throat	2	0.0183618	0.0176477	0.0188073	0.0195046	586.276
winter	N384052	female	throat	1	0.0163475	0.0156664	0.016865	0.0175524	524.498
winter	N384052	female	throat	2	0.0213556	0.0205693	0.0224377	0.022801	688.868
winter	N384190	female	throat	1	0.0240586	0.0243235	0.0276189	0.0304665	854.077
winter	N384190	female	throat	2	0.0245194	0.026766	0.0300631	0.0326439	921.775
winter	N409651	female	throat	1	0.0190924	0.0192118	0.0210097	0.0220812	648.416
winter	N409651	female	throat	2	0.0257075	0.0252524	0.0277424	0.0299275	864.066
winter	N384195	female	throat	1	0.0231207	0.0231179	0.0260971	0.0273549	796.079
winter	N384195	female	throat	2	0.0209635	0.0208936	0.0233929	0.0251273	721.614
winter	N409750	female	throat	1	0.018096	0.0184744	0.0196456	0.0198801	604.489
winter	N409750	female	throat	2	0.0233103	0.0229182	0.0244185	0.0251942	758.243
winter	N384359	female	throat	1	0.0117106	0.0123302	0.0138217	0.0148041	423.564
winter	N384359	female	throat	2	0.0190824	0.0200153	0.022686	0.0246218	695.791
winter	N384196	female	throat	1	0.0117286	0.0119728	0.0138424	0.0131371	404.996
winter	N384196	female	throat	2	0.0221926	0.0233565	0.0256486	0.0264887	782.578
winter	N384199	female	throat	1	0.0163045	0.0185868	0.0203072	0.0225203	630.712
winter	N384199	female	throat	2	0.0207504	0.0226963	0.0253313	0.0270593	774.084
winter	N384202	female	throat	1	0.015215	0.0169514	0.0187768	0.0187774	562.36
winter	N384202	female	throat	2	0.0177336	0.0197613	0.0213169	0.0223305	654.1
winter	N409790	female	throat	1	0.0120607	0.0143098	0.0169511	0.017522	498.529
winter	N409790	female	throat	2	0.0107319	0.0128481	0.0151052	0.0159029	447.763
winter	N409545	female	throat	1	0.0222444	0.0228013	0.0237159	0.0243118	738.466
winter	N409545	female	throat	2	0.026565	0.0263052	0.0282492	0.0286158	869.001
winter	N409795	female	throat	1	0.0114833	0.0125845	0.0137987	0.0143781	420.852
winter	N409795	female	throat	2	0.0172487	0.019774	0.0214951	0.0230049	660.654
winter	N409796	female	throat	1	0.0128041	0.0144803	0.0156373	0.0167004	481.993
winter	N409796	female	throat	2	0.0225924	0.0264129	0.0287944	0.0322593	896.128
winter	N409052	female	throat	1	0.0156457	0.0160372	0.0177111	0.019103	548.274
winter	N409052	female	throat	2	0.0254668	0.0253463	0.0267489	0.0291494	847.079
winter	N409053	female	throat	1	0.0194028	0.0199286	0.0215868	0.0238552	678.15
winter	N409053	female	throat	2	0.0192015	0.0188812	0.0203713	0.0218332	637.26
winter	N409032	female	breast	1	0.0135796	0.0168921	0.0156677	0.0156798	496.862
winter	N409032	female	breast	2	0.0139984	0.0156595	0.0153879	0.0156213	483.975
winter	N409692	female	breast	1	0.0186239	0.0233916	0.0222236	0.019243	669.416
winter	N409692	female	breast	2	0.0134147	0.0177035	0.0171678	0.0165928	526.793
winter	N409693	female	breast	1	0.0133301	0.0149504	0.015033	0.0147912	464.136
winter	N409693	female	breast	2	0.0134847	0.0156418	0.0155511	0.0156303	483.771
winter	N409761	female	breast	1	0.0227525	0.0275781	0.0281115	0.0262091	843.629
winter	N409761	female	breast	2	0.0223431	0.0288679	0.0299424	0.0278022	886.627
winter	N384068	female	breast	1	0.00741053	0.00706301	0.00866217	0.00773763	245.307
winter	N384068	female	breast	2	0.00884844	0.0100758	0.0116055	0.00987014	325.843
winter	N409696	female	breast	1	0.0191	0.0215263	0.0217531	0.0213514	669.537
winter	N409696	female	breast	2	0.0165838	0.0191969	0.0187532	0.0195157	593.711
winter	N347784	female	breast	1	0.0180446	0.0194427	0.0197384	0.0208394	622.872
winter	N347784	female	breast	2	0.0201292	0.0216414	0.0217044	0.0213969	673.976
winter	N409698	female	breast	1	0.013508	0.0149954	0.0147285	0.0157361	471.023
winter	N409698	female	breast	2	0.0138586	0.013978	0.014124	0.0145172	445.767
winter	N409699	female	breast	1	0.0138507	0.0147333	0.0149625	0.0144778	460.317
winter	N409699	female	breast	2	0.016011	0.0165246	0.017212	0.0160467	520.298
winter	N409700	female	breast	1	0.0191183	0.0197314	0.0197924	0.0201574	623.189
winter	N409700	female	breast	2	0.0178197	0.0191683	0.0203188	0.0211781	628.52
winter	N430290	female	breast	1	0.018381	0.0195006	0.0194562	0.0191764	606.157
winter	N430290	female	breast	2	0.0184175	0.0201661	0.021146	0.0205262	641.414
winter	N378224	female	breast	1	0.0133018	0.0158854	0.0164437	0.0167394	504.468
winter	N378224	female	breast	2	0.0143559	0.0172412	0.0186225	0.0189865	562.512
winter	N430291	female	breast	1	0.0182286	0.022048	0.0215863	0.0209273	665.658
winter	N430291	female	breast	2	0.019337	0.0233758	0.0222543	0.0215553	693.667
winter	N430292	female	breast	1	0.0174363	0.0178713	0.0188366	0.0191344	581.976
winter	N430292	female	breast	2	0.0189805	0.0210272	0.0220374	0.0231051	683.912
winter	N384186	female	breast	1	0.0208564	0.0220667	0.0245523	0.0260338	751.577
winter	N384186	female	breast	2	0.0186557	0.0199375	0.0211653	0.0215687	650.143
winter	N430088	female	breast	1	0.0223587	0.0235844	0.0253205	0.0241402	759.928
winter	N430088	female	breast	2	0.0216482	0.0240686	0.0253195	0.0230311	751.449
winter	N430238	female	breast	1	0.0168627	0.0175657	0.018601	0.0190081	573.829
winter	N430238	female	breast	2	0.0167767	0.0171237	0.0180675	0.0178486	553.496
winter	N430300	female	breast	1	0.0155529	0.0164121	0.0171272	0.015811	514.713
winter	N430300	female	breast	2	0.0125931	0.0143937	0.0154399	0.0148713	461.419
winter	N384188	female	breast	1	0.0141604	0.0149165	0.0152393	0.0143034	464.066
winter	N384188	female	breast	2	0.0165593	0.0174307	0.0180761	0.0165743	543.636
winter	N384052	female	breast	1	0.0172346	0.017134	0.0175388	0.0172622	544.455
winter	N384052	female	breast	2	0.0171331	0.0175237	0.0185225	0.0178467	562.7
winter	N384190	female	breast	1	0.0270007	0.0271786	0.0294074	0.0310084	912.042
winter	N384190	female	breast	2	0.0372465	0.0363619	0.0388453	0.0404288	1209.19
winter	N409651	female	breast	1	0.0211156	0.0204048	0.0205778	0.0203813	645.698
winter	N409651	female	breast	2	0.0189194	0.0187158	0.0194972	0.0182619	592.778
winter	N384195	female	breast	1	0.0186421	0.0183751	0.0187144	0.0172292	571.46
winter	N384195	female	breast	2	0.0222844	0.0234145	0.0229202	0.0205199	700.719
winter	N409750	female	breast	1	0.018752	0.0191272	0.0188653	0.0169162	577.084
winter	N409750	female	breast	2	0.0228534	0.0221238	0.0221184	0.0203706	681.862
winter	N384359	female	breast	1	0.0223366	0.022151	0.0235446	0.0223244	712.647
winter	N384359	female	breast	2	0.0194773	0.0185226	0.01979	0.0194486	606.925
winter	N384196	female	breast	1	0.0116812	0.0116861	0.0113766	0.0101375	350.017
winter	N384196	female	breast	2	0.0208222	0.0234161	0.0240137	0.0206666	707.889
winter	N384199	female	breast	1	0.0170928	0.0208984	0.0212155	0.0198922	638.234
winter	N384199	female	breast	2	0.018955	0.0224892	0.0226128	0.0219048	691.25
winter	N384202	female	breast	1	0.0153988	0.0180162	0.0181488	0.0168328	548.101
winter	N384202	female	breast	2	0.0181663	0.0209966	0.0223505	0.0223337	676.727
winter	N409790	female	breast	1	0.0130539	0.0168501	0.0170456	0.0158939	510.205
winter	N409790	female	breast	2	0.0124168	0.0151133	0.0164104	0.0147502	475.609
winter	N409545	female	breast	1	0.0152076	0.0157257	0.0155183	0.0137197	472.065
winter	N409545	female	breast	2	0.0220932	0.0227352	0.0224957	0.0211103	695.397
winter	N409795	female	breast	1	0.01731	0.0181291	0.0190659	0.0187834	582.804
winter	N409795	female	breast	2	0.0186279	0.0213379	0.0204957	0.0196491	637.999
winter	N409796	female	breast	1	0.0130737	0.0146547	0.0163984	0.0159283	484.656
winter	N409796	female	breast	2	0.0135952	0.0150549	0.0163523	0.0156981	487.373
winter	N409052	female	breast	1	0.0127858	0.013929	0.0146802	0.0151556	453.153
winter	N409052	female	breast	2	0.0142475	0.015248	0.0163437	0.0162484	496.37
winter	N409053	female	breast	1	0.0178501	0.0189711	0.018951	0.0190586	593.597
winter	N409053	female	breast	2	0.0195047	0.0205654	0.0198586	0.0188499	620.317
winter	N409032	female	belly	1	0.0333274	0.0340007	0.0375794	0.0395681	1154.47
winter	N409032	female	belly	2	0.0214274	0.0230597	0.0242826	0.0250011	750.037
winter	N409692	female	belly	1	0.0508166	0.0532792	0.054849	0.0561416	1709.84
winter	N409692	female	belly	2	0.0239464	0.0249062	0.0261902	0.0265485	808.171
winter	N409693	female	belly	1	0.0322257	0.0337694	0.0373714	0.0393828	1144.93
winter	N409693	female	belly	2	0.0408504	0.0428348	0.0486953	0.0510659	1475.25
winter	N409761	female	belly	1	0.0220869	0.0243893	0.0256107	0.0250741	777.803
winter	N409761	female	belly	2	0.023826	0.0240442	0.0256244	0.0261576	790.867
winter	N384068	female	belly	1	0.020095	0.021979	0.0230077	0.0225008	699.98
winter	N384068	female	belly	2	0.0319716	0.0320655	0.0337067	0.0331156	1034.22
winter	N409696	female	belly	1	0.0193241	0.0205851	0.0211646	0.0226051	667.891
winter	N409696	female	belly	2	0.018579	0.0200332	0.0217219	0.0227239	667.023
winter	N347784	female	belly	1	0.0260582	0.0258011	0.0270613	0.0280047	845.445
winter	N347784	female	belly	2	0.0345666	0.0361061	0.0387704	0.0414578	1206.82
winter	N409698	female	belly	1	0.0244321	0.023914	0.0261547	0.0265251	800.375
winter	N409698	female	belly	2	0.0252781	0.024805	0.0253885	0.0267737	806.015
winter	N409699	female	belly	1	0.0206172	0.0190042	0.0208491	0.0205061	635.339
winter	N409699	female	belly	2	0.0251877	0.0241607	0.0265887	0.0272294	815.972
winter	N409700	female	belly	1	0.0397839	0.0405756	0.0432584	0.0448246	1339.76
winter	N409700	female	belly	2	0.0347928	0.0343429	0.0364687	0.03752	1132.38
winter	N430290	female	belly	1	0.0317664	0.0305855	0.0350594	0.0355538	1056.42
winter	N430290	female	belly	2	0.0364515	0.0367669	0.0418923	0.0440565	1273.97
winter	N378224	female	belly	1	0.0164588	0.0184716	0.0194686	0.0205504	603.518
winter	N378224	female	belly	2	0.0185916	0.0200796	0.0208982	0.0216809	649.637
winter	N430291	female	belly	1	0.0192855	0.0205415	0.021911	0.0224024	672.771
winter	N430291	female	belly	2	0.0209074	0.0219627	0.0236828	0.0241516	724.655
winter	N430292	female	belly	1	0.0346291	0.0338436	0.0374669	0.039387	1154.65
winter	N430292	female	belly	2	0.0285808	0.0286455	0.0322663	0.0334025	980.878
winter	N384186	female	belly	1	0.033854	0.0332844	0.0391556	0.0406023	1174.97
winter	N384186	female	belly	2	0.0374277	0.0381372	0.0429403	0.0438692	1297.99
winter	N430088	female	belly	1	0.0278632	0.0280218	0.0302333	0.0304489	925.301
winter	N430088	female	belly	2	0.0325455	0.0328543	0.0355146	0.0363207	1090.94
winter	N430238	female	belly	1	0.0269639	0.02671	0.0278264	0.0278409	862.553
winter	N430238	female	belly	2	0.0265295	0.0273043	0.0278544	0.0275946	864.364
winter	N430300	female	belly	1	0.0191586	0.0200778	0.0218439	0.0215001	659.08
winter	N430300	female	belly	2	0.0234372	0.0226901	0.0251907	0.024822	760.693
winter	N384188	female	belly	1	0.0301798	0.0306267	0.0324184	0.0317852	990.262
winter	N384188	female	belly	2	0.0299658	0.0295389	0.031352	0.0309367	961.437
winter	N384052	female	belly	1	0.0304679	0.0301926	0.0320916	0.0324694	990.576
winter	N384052	female	belly	2	0.0292836	0.0282029	0.029779	0.0301524	924.468
winter	N384190	female	belly	1	0.0250635	0.0249428	0.0287963	0.0294729	865.18
winter	N384190	female	belly	2	0.0274226	0.0261848	0.0309686	0.032838	937.019
winter	N409651	female	belly	1	0.0319226	0.0305873	0.0339278	0.0337554	1029.02
winter	N409651	female	belly	2	0.0348125	0.0339546	0.0376258	0.0384439	1148.96
winter	N384195	female	belly	1	0.0289766	0.0273784	0.0287849	0.0283643	889.573
winter	N384195	female	belly	2	0.0251219	0.0252964	0.026955	0.025525	813.485
winter	N409750	female	belly	1	0.0332721	0.0308616	0.0326495	0.0320158	1007.18
winter	N409750	female	belly	2	0.0340402	0.0330252	0.0338855	0.0341215	1060.93
winter	N384359	female	belly	1	0.0384307	0.0378254	0.0398016	0.0403839	1235.17
winter	N384359	female	belly	2	0.037853	0.0364356	0.0381757	0.0391369	1193.22
winter	N384196	female	belly	1	0.0341925	0.0330867	0.0345327	0.0344664	1071.55
winter	N384196	female	belly	2	0.0314226	0.0313967	0.0328355	0.0331438	1018.14
winter	N384199	female	belly	1	0.0207588	0.02227	0.0243011	0.0243209	734.536
winter	N384199	female	belly	2	0.0210489	0.0229097	0.0246279	0.0245065	746.162
winter	N384202	female	belly	1	0.0180378	0.0195597	0.021061	0.0202735	631.521
winter	N384202	female	belly	2	0.0178411	0.0194566	0.0206854	0.0197471	621.326
winter	N409790	female	belly	1	0.0399092	0.0443722	0.0483894	0.0511787	1483.89
winter	N409790	female	belly	2	0.038366	0.0419225	0.047236	0.049342	1428.31
winter	N409545	female	belly	1	0.0248523	0.0240036	0.0259468	0.0252117	788.231
winter	N409545	female	belly	2	0.0221567	0.0218474	0.0236698	0.0230305	717.18
winter	N409795	female	belly	1	0.015831	0.0159867	0.0182368	0.0175584	539.095
winter	N409795	female	belly	2	0.0162339	0.0167115	0.0189166	0.0192739	569.667
winter	N409796	female	belly	1	0.016396	0.0168063	0.0205968	0.0212912	606.418
winter	N409796	female	belly	2	0.0199824	0.0203292	0.0238338	0.0252882	719.099
winter	N409052	female	belly	1	0.0161199	0.0169363	0.0189061	0.0197916	576.045
winter	N409052	female	belly	2	0.0207837	0.0192084	0.0225199	0.0231606	678.969
winter	N409053	female	belly	1	0.0225786	0.0226211	0.0234598	0.0240591	733.105
winter	N409053	female	belly	2	0.0195763	0.0200684	0.0213918	0.0222416	662.935
spring	N384078	male	throat	1	0.0363131	0.0390304	0.040522	0.0416436	1257.68
spring	N384078	male	throat	2	0.0324575	0.0340699	0.0358337	0.0364502	1105.84
spring	N409751	male	throat	1	0.0259798	0.0278632	0.0300122	0.0309153	919.767
spring	N409751	male	throat	2	0.0214664	0.0224636	0.0242969	0.0250876	745.796
spring	N409472	male	throat	1	0.0155197	0.0146431	0.0175506	0.0167535	511.786
spring	N409472	male	throat	2	0.0170047	0.0179546	0.0199563	0.0196492	597.05
spring	N384087	male	throat	1	0.0169226	0.0178174	0.0197142	0.0196634	593.315
spring	N384087	male	throat	2	0.01577	0.0178104	0.0192116	0.0182075	570.803
spring	N409787	male	throat	1	0.0114975	0.011544	0.0129137	0.0127448	387.627
spring	N409787	male	throat	2	0.0104442	0.0101897	0.0116347	0.011068	343.749
spring	N200300	male	throat	1	0.0118285	0.012244	0.0139218	0.0138007	414.756
spring	N200300	male	throat	2	0.0170791	0.0178311	0.0196887	0.0201874	598.629
spring	N430032	male	throat	1	0.0361851	0.0381484	0.041445	0.0430641	1271.73
spring	N430032	male	throat	2	0.0239911	0.0238627	0.0255085	0.0259349	786.578
spring	N430410	male	throat	1	0.0184582	0.0201422	0.0212694	0.0186512	624.953
spring	N430410	male	throat	2	0.0216649	0.0236831	0.024835	0.0243384	755.589
spring	N347539	male	throat	1	0.0388126	0.0413604	0.0441835	0.0453021	1357.03
spring	N347539	male	throat	2	0.031514	0.0328622	0.0349077	0.0341406	1061.16
spring	N409837	male	throat	1	0.0433714	0.0453157	0.0475622	0.0481044	1467.02
spring	N409837	male	throat	2	0.039453	0.0410888	0.0441162	0.0442203	1345.95
spring	N430412	male	throat	1	0.0225009	0.0231567	0.0252082	0.025686	769.99
spring	N430412	male	throat	2	0.0178409	0.019473	0.0217258	0.0229171	661.388
spring	N430411	male	throat	1	0.0265542	0.0274155	0.0299862	0.0304806	913.367
spring	N430411	male	throat	2	0.0128016	0.0128564	0.0148452	0.0151413	445.106
spring	N317598	male	throat	1	0.02745	0.0316577	0.0333234	0.0356803	1035.69
spring	N317598	male	throat	2	0.0212479	0.0230545	0.0244499	0.026652	766.513
spring	N461019	male	throat	1	0.0452066	0.0458498	0.0491531	0.0507681	1518.51
spring	N461019	male	throat	2	0.0224432	0.0254543	0.0282118	0.0282707	843.944
spring	N461062	male	throat	1	0.0325229	0.0350398	0.0376221	0.0381386	1148.06
spring	N461062	male	throat	2	0.0270187	0.0287854	0.0315132	0.0327342	963.241
spring	N461106	male	throat	1	0.0221254	0.0224895	0.0239417	0.0229923	725.109
spring	N461106	male	throat	2	0.0272209	0.0273869	0.0291464	0.0287151	890.574
spring	N409455	male	throat	1	0.0167659	0.0171371	0.0194986	0.0184558	573.273
spring	N409455	male	throat	2	0.0135039	0.0139197	0.0162961	0.0152353	472.035
spring	N347845	male	throat	1	0.0295126	0.0331502	0.0356924	0.0357648	1079.92
spring	N347845	male	throat	2	0.0327388	0.034092	0.0359982	0.0378157	1121.4
spring	N384314	male	throat	1	0.0217886	0.0231206	0.023312	0.0218131	712.391
spring	N384314	male	throat	2	0.0279694	0.0293817	0.0289393	0.0280086	902.253
spring	N461117	male	throat	1	0.0326219	0.0357839	0.0378685	0.0402205	1176.98
spring	N461117	male	throat	2	0.0411116	0.0403962	0.0423894	0.0436528	1323.13
spring	N409743	male	throat	1	0.0208396	0.0237007	0.0243402	0.0276181	778.903
spring	N409743	male	throat	2	0.023722	0.0257816	0.0272829	0.0312915	870.423
spring	N430443	male	throat	1	0.0267537	0.0296297	0.0296225	0.0284849	911.533
spring	N430443	male	throat	2	0.0197873	0.022369	0.0228092	0.0224306	699.828
spring	N430444	male	throat	1	0.025426	0.0271647	0.0307339	0.0338864	946.602
spring	N430444	male	throat	2	0.0114126	0.0117365	0.0132653	0.0139031	403.366
spring	N430268	male	throat	1	0.0292069	0.0293486	0.030288	0.028469	923.627
spring	N430268	male	throat	2	0.0225149	0.0217263	0.0232324	0.0229909	712.652
spring	N430445	male	throat	1	0.0168257	0.0185511	0.0199909	0.0202971	608.193
spring	N430445	male	throat	2	0.0140472	0.0153892	0.0162499	0.016838	501.572
spring	N347601	male	throat	1	0.0216873	0.0242334	0.0255748	0.0243034	767.486
spring	N347601	male	throat	2	0.0154782	0.0168449	0.0175637	0.0174803	538.258
spring	N347996	male	throat	1	0.0175903	0.0201559	0.0223414	0.0201357	646.571
spring	N347996	male	throat	2	0.0247697	0.0272584	0.0297062	0.0287125	886.639
spring	N310082	male	throat	1	0.0221249	0.0248376	0.0276428	0.0280619	829.842
spring	N310082	male	throat	2	0.0227466	0.02587	0.0292614	0.030137	876.453
spring	N430031	male	throat	1	0.0114352	0.012393	0.0133127	0.0130759	402.008
spring	N430031	male	throat	2	0.0161208	0.0175167	0.018598	0.0170821	552.799
spring	N461121	male	throat	1	0.0168761	0.0184573	0.0187767	0.0186271	579.981
spring	N461121	male	throat	2	0.0205605	0.0208362	0.0211304	0.022314	671.224
spring	N430198	male	throat	1	0.0257935	0.0275259	0.0289577	0.0284032	882.247
spring	N430198	male	throat	2	0.0265638	0.0281925	0.0283738	0.0268835	870.821
spring	N384494	male	throat	1	0.022079	0.022463	0.0249284	0.0252739	755.773
spring	N384494	male	throat	2	0.0174181	0.0184978	0.0202763	0.0204491	613.926
spring	N384078	male	breast	1	0.0482497	0.05232	0.0460117	0.0401638	1456.31
spring	N384078	male	breast	2	0.0523979	0.054858	0.0473037	0.0412886	1516.11
spring	N409751	male	breast	1	0.0216792	0.0233589	0.0229549	0.021229	705.18
spring	N409751	male	breast	2	0.0258718	0.0283691	0.0266098	0.0241655	827.318
spring	N409472	male	breast	1	0.0355147	0.0345325	0.0318502	0.0277807	999.95
spring	N409472	male	breast	2	0.0275724	0.0261975	0.0246046	0.0216307	770.244
spring	N384087	male	breast	1	0.0292224	0.0292585	0.0274723	0.02298	843.837
spring	N384087	male	breast	2	0.0441142	0.0444132	0.0396013	0.0337977	1249.36
spring	N409787	male	breast	1	0.050997	0.0582877	0.0547853	0.0460576	1659.95
spring	N409787	male	breast	2	0.0513004	0.0581389	0.0541176	0.046532	1657.56
spring	N200300	male	breast	1	0.0310801	0.0298709	0.0270225	0.0226542	848.095
spring	N200300	male	breast	2	0.0380622	0.0388746	0.0357647	0.0299391	1105.83
spring	N430032	male	breast	1	0.0443358	0.0453075	0.0411799	0.0347469	1282.44
spring	N430032	male	breast	2	0.057265	0.059853	0.0526817	0.0446271	1661
spring	N430410	male	breast	1	0.0505607	0.05588	0.0538761	0.0477221	1643.7
spring	N430410	male	breast	2	0.0288177	0.0305165	0.0285453	0.0247739	881.038
spring	N347539	male	breast	1	0.0373384	0.0383312	0.0354104	0.0294891	1090.86
spring	N347539	male	breast	2	0.0415351	0.043284	0.0394426	0.0328493	1220.16
spring	N409837	male	breast	1	0.0414624	0.0448744	0.0422098	0.0362017	1292.64
spring	N409837	male	breast	2	0.049212	0.0537875	0.0512326	0.0458648	1577.2
spring	N430412	male	breast	1	0.041838	0.044508	0.0429555	0.0378406	1313.3
spring	N430412	male	breast	2	0.0421745	0.0456501	0.0428253	0.0369847	1315.33
spring	N430411	male	breast	1	0.0335014	0.0363409	0.0340173	0.0282572	1035
spring	N430411	male	breast	2	0.0392496	0.0439864	0.0407242	0.0344293	1246.11
spring	N317598	male	breast	1	0.0357761	0.0363186	0.0320164	0.0276668	1017.34
spring	N317598	male	breast	2	0.0265467	0.0272002	0.0254512	0.022914	796.073
spring	N461019	male	breast	1	0.0269634	0.0300724	0.0289634	0.0259794	886.238
spring	N461019	male	breast	2	0.0272067	0.0291162	0.027636	0.0240914	847.819
spring	N461062	male	breast	1	0.0141828	0.0148071	0.016066	0.0146162	474.185
spring	N461062	male	breast	2	0.0394712	0.0422013	0.0413282	0.0390777	1280.43
spring	N461106	male	breast	1	0.0415609	0.045397	0.0432274	0.0392622	1336.3
spring	N461106	male	breast	2	0.040638	0.0428447	0.0415953	0.0372638	1275.69
spring	N409455	male	breast	1	0.0380679	0.0393711	0.0378604	0.0336623	1165.71
spring	N409455	male	breast	2	0.0364425	0.0379775	0.0361879	0.0315321	1111.46
spring	N347845	male	breast	1	0.0354394	0.0378772	0.0325614	0.0288525	1046.58
spring	N347845	male	breast	2	0.0366728	0.039569	0.0349324	0.0309633	1108.83
spring	N384314	male	breast	1	0.0446518	0.0458581	0.0396736	0.0326494	1254.01
spring	N384314	male	breast	2	0.0560532	0.057264	0.050267	0.0428291	1593.32
spring	N461117	male	breast	1	0.020172	0.0203843	0.0208018	0.0191988	633.441
spring	N461117	male	breast	2	0.0249862	0.0250455	0.0237096	0.023076	756.07
spring	N409743	male	breast	1	0.0312162	0.0327407	0.0328918	0.0319632	1018.93
spring	N409743	male	breast	2	0.0324389	0.0351579	0.0350709	0.0328515	1074.27
spring	N430443	male	breast	1	0.0199447	0.0219862	0.0229455	0.0218319	692.654
spring	N430443	male	breast	2	0.0149941	0.0163575	0.0159536	0.0152767	495.856
spring	N430444	male	breast	1	0.0305245	0.0336416	0.0319386	0.0297939	994.973
spring	N430444	male	breast	2	0.0329022	0.0345653	0.0321392	0.0298651	1013.84
spring	N430268	male	breast	1	0.0427654	0.0416432	0.035116	0.0288329	1129.64
spring	N430268	male	breast	2	0.0276034	0.0275877	0.0241011	0.0195511	758.329
spring	N430445	male	breast	1	0.0298002	0.0304896	0.0292534	0.026566	907.839
spring	N430445	male	breast	2	0.0392244	0.0389447	0.0364154	0.0334059	1149.25
spring	N347601	male	breast	1	0.0360576	0.0391808	0.0378871	0.0340227	1160.9
spring	N347601	male	breast	2	0.0363565	0.0399021	0.0379958	0.0332131	1161.81
spring	N347996	male	breast	1	0.0533655	0.0592993	0.055911	0.0488733	1714.37
spring	N347996	male	breast	2	0.033413	0.0372865	0.0349636	0.0299303	1068.1
spring	N310082	male	breast	1	0.0429612	0.0450484	0.0391261	0.0318324	1228.08
spring	N310082	male	breast	2	0.0437308	0.0473728	0.0412934	0.0341381	1294.25
spring	N430031	male	breast	1	0.037762	0.0393348	0.0360091	0.0322117	1132.64
spring	N430031	male	breast	2	0.0345699	0.0348034	0.0325426	0.0287391	1014.96
spring	N461121	male	breast	1	0.0399256	0.039277	0.0335867	0.0284196	1080.13
spring	N461121	male	breast	2	0.0441074	0.0456616	0.039056	0.0338995	1256.11
spring	N430198	male	breast	1	0.0635234	0.0682799	0.0581261	0.0496599	1857.77
spring	N430198	male	breast	2	0.0629334	0.0676547	0.057793	0.0487826	1838.71
spring	N384494	male	breast	1	0.0363414	0.0394555	0.0355172	0.0288123	1092.24
spring	N384494	male	breast	2	0.0412705	0.0434729	0.0391948	0.0328018	1218.09
spring	N384078	male	belly	1	0.0232688	0.0240806	0.0252758	0.0261781	786.101
spring	N384078	male	belly	2	0.0175237	0.018716	0.0193484	0.0196961	600.09
spring	N409751	male	belly	1	0.0234834	0.0241268	0.0253665	0.0248564	775.722
spring	N409751	male	belly	2	0.025359	0.0263642	0.0275405	0.026917	842.605
spring	N409472	male	belly	1	0.0245877	0.0244911	0.025412	0.0248263	782.851
spring	N409472	male	belly	2	0.0226014	0.0215997	0.0223389	0.0214184	688.321
spring	N384087	male	belly	1	0.0199495	0.0196299	0.0214731	0.0191221	631.801
spring	N384087	male	belly	2	0.0216526	0.0214427	0.0227856	0.0211248	685.343
spring	N409787	male	belly	1	0.0216325	0.0215095	0.0229817	0.0225776	701.42
spring	N409787	male	belly	2	0.0238965	0.023685	0.026393	0.025013	784.673
spring	N200300	male	belly	1	0.0499127	0.0492509	0.051596	0.0528386	1608.02
spring	N200300	male	belly	2	0.0261921	0.0254123	0.026823	0.0260829	822.061
spring	N430032	male	belly	1	0.0299614	0.029563	0.0297161	0.0282814	920.724
spring	N430032	male	belly	2	0.0322421	0.0311861	0.0303861	0.0280284	947.066
spring	N430410	male	belly	1	0.0341276	0.0348741	0.0371783	0.0361479	1128.95
spring	N430410	male	belly	2	0.0175274	0.0183455	0.0195759	0.0191916	594.284
spring	N347539	male	belly	1	0.0292872	0.0294171	0.0324463	0.0332424	990.403
spring	N347539	male	belly	2	0.0253568	0.0264207	0.0289769	0.0285522	872.493
spring	N409837	male	belly	1	0.0290823	0.0307102	0.0328649	0.0314582	988.618
spring	N409837	male	belly	2	0.0274882	0.0286203	0.0306053	0.0293286	922.513
spring	N430412	male	belly	1	0.0228451	0.0223504	0.0242756	0.024003	739.035
spring	N430412	male	belly	2	0.0315028	0.0310517	0.0337409	0.0346579	1038.39
spring	N430411	male	belly	1	0.0283561	0.0278026	0.029185	0.0282112	893.753
spring	N430411	male	belly	2	0.0269978	0.0275582	0.0285132	0.0274214	873.024
spring	N317598	male	belly	1	0.0179618	0.0190619	0.0199675	0.0188626	602.887
spring	N317598	male	belly	2	0.0194396	0.0197927	0.0204017	0.0190876	620.739
spring	N461019	male	belly	1	0.0221319	0.0232133	0.0240456	0.0228031	730.837
spring	N461019	male	belly	2	0.0246304	0.0246539	0.026421	0.0261618	806.847
spring	N461062	male	belly	1	0.0304832	0.0326588	0.0315717	0.0281266	966.824
spring	N461062	male	belly	2	0.0162937	0.0162533	0.0174634	0.0157687	518.677
spring	N461106	male	belly	1	0.035817	0.0363602	0.0387214	0.0388083	1187.96
spring	N461106	male	belly	2	0.0283339	0.0303339	0.031457	0.030256	957.692
spring	N409455	male	belly	1	0.0304709	0.0307813	0.0326064	0.031737	994.008
spring	N409455	male	belly	2	0.0233214	0.0234083	0.0248248	0.0239134	754.615
spring	N347845	male	belly	1	0.0287219	0.0308346	0.0327914	0.0327563	999.977
spring	N347845	male	belly	2	0.0295276	0.0309069	0.0327172	0.032986	1004.76
spring	N384314	male	belly	1	0.0233598	0.0238537	0.0236794	0.0229769	738.733
spring	N384314	male	belly	2	0.0209749	0.0206852	0.021179	0.0195555	645.863
spring	N461117	male	belly	1	0.026663	0.0262245	0.0278218	0.028279	861.27
spring	N461117	male	belly	2	0.0210667	0.0211483	0.023081	0.0232692	703.753
spring	N409743	male	belly	1	0.020198	0.0214269	0.0225223	0.0220986	686.874
spring	N409743	male	belly	2	0.0179774	0.019059	0.019904	0.0204069	616.781
spring	N430443	male	belly	1	0.0177359	0.0193411	0.0201483	0.0202655	619.552
spring	N430443	male	belly	2	0.0198465	0.0212762	0.0225814	0.0228529	692.001
spring	N430444	male	belly	1	0.0476189	0.0479988	0.0491341	0.0494013	1532.8
spring	N430444	male	belly	2	0.0300454	0.0307863	0.0331082	0.0343362	1021.92
spring	N430268	male	belly	1	0.0288416	0.0275287	0.0279245	0.0258356	858.322
spring	N430268	male	belly	2	0.0258573	0.0261103	0.0265145	0.0232812	797.867
spring	N430445	male	belly	1	0.0341365	0.0346577	0.0364984	0.0379123	1136.95
spring	N430445	male	belly	2	0.0372202	0.0368207	0.0387827	0.0408149	1216.21
spring	N347601	male	belly	1	0.0179768	0.0188212	0.0195776	0.0199894	607.545
spring	N347601	male	belly	2	0.0249991	0.0246863	0.0268838	0.0258758	810.218
spring	N347996	male	belly	1	0.0355411	0.037727	0.0399725	0.0393274	1216.34
spring	N347996	male	belly	2	0.0313412	0.0329677	0.0351459	0.0354251	1075.9
spring	N310082	male	belly	1	0.0250284	0.0257713	0.0259307	0.0234553	787.976
spring	N310082	male	belly	2	0.0173429	0.0182892	0.0186918	0.0166883	561.028
spring	N430031	male	belly	1	0.0229877	0.0243642	0.0247357	0.0234151	756.484
spring	N430031	male	belly	2	0.0181363	0.0196487	0.0202718	0.019343	616.198
spring	N461121	male	belly	1	0.0266352	0.0285806	0.0296178	0.0308602	924.003
spring	N461121	male	belly	2	0.0241178	0.0252035	0.0257394	0.0257795	799.779
spring	N430198	male	belly	1	0.023794	0.0243671	0.0257601	0.0245966	780.325
spring	N430198	male	belly	2	0.0220666	0.0216826	0.0226596	0.0208945	685.485
spring	N384494	male	belly	1	0.0184729	0.0185717	0.0201523	0.0181543	595.388
spring	N384494	male	belly	2	0.0185647	0.0184601	0.0192342	0.0186659	590.521
spring	N409807	female	throat	1	0.027135	0.0288025	0.0325034	0.0346319	991.274
spring	N409807	female	throat	2	0.0333715	0.0362664	0.0404496	0.0428575	1233.79
spring	N384389	female	throat	1	0.0291382	0.0332218	0.0373227	0.041908	1152.88
spring	N384389	female	throat	2	0.0256569	0.0281443	0.0320693	0.0352013	981.524
spring	N384423	female	throat	1	0.0326299	0.0352349	0.0398976	0.0440885	1228.24
spring	N384423	female	throat	2	0.0331028	0.0366739	0.0414869	0.0450787	1267.51
spring	N409827	female	throat	1	0.0263415	0.028163	0.0320501	0.0346551	978.68
spring	N409827	female	throat	2	0.0294882	0.0313645	0.0354898	0.0381308	1084.1
spring	N409646	female	throat	1	0.0314917	0.0335603	0.0384797	0.0425791	1181.43
spring	N409646	female	throat	2	0.0393401	0.0420997	0.047588	0.0527716	1468.79
spring	N384053	female	throat	1	0.0241028	0.0255623	0.028425	0.0300212	868.996
spring	N384053	female	throat	2	0.0359587	0.0391036	0.0428775	0.0464447	1325.23
spring	N409850	female	throat	1	0.0320912	0.0360358	0.041625	0.0457554	1266.11
spring	N409850	female	throat	2	0.0319019	0.0352204	0.0406816	0.0449902	1241.79
spring	N384387	female	throat	1	0.0119149	0.0134749	0.0155172	0.0163605	465.662
spring	N384387	female	throat	2	0.0157295	0.0177872	0.0210462	0.0223499	627.267
spring	N384345	female	throat	1	0.0373677	0.0386322	0.0428082	0.0452204	1313.59
spring	N384345	female	throat	2	0.0268968	0.0291102	0.0340628	0.0367397	1028.25
spring	N384370	female	throat	1	0.0488752	0.0528559	0.059441	0.0648093	1825.77
spring	N384370	female	throat	2	0.0517481	0.0531773	0.0572982	0.0589653	1762.51
spring	N409215	female	throat	1	0.0515289	0.054836	0.0609757	0.0646127	1865.54
spring	N409215	female	throat	2	0.0429082	0.0468303	0.0533205	0.0583452	1631.39
spring	N409806	female	throat	1	0.0178556	0.0212021	0.02398	0.0258207	726.172
spring	N409806	female	throat	2	0.0284473	0.0302857	0.0338832	0.0351349	1027.15
spring	N384478	female	throat	1	0.0210686	0.0237609	0.028656	0.0319663	863.217
spring	N384478	female	throat	2	0.027351	0.0315085	0.0366702	0.0415679	1122
spring	N461061	female	throat	1	0.0417114	0.0500897	0.0584233	0.0629452	1749.54
spring	N461061	female	throat	2	0.0283382	0.032906	0.0374834	0.0407921	1138.47
spring	N384368	female	throat	1	0.0161258	0.0166628	0.0197828	0.0213577	596.891
spring	N384368	female	throat	2	0.0222918	0.0244545	0.0287988	0.0316044	871.524
spring	N384379	female	throat	1	0.0340722	0.0358826	0.0400843	0.0432468	1232.8
spring	N384379	female	throat	2	0.0257188	0.0275066	0.0349051	0.038918	1038.64
spring	N461116	female	throat	1	0.0318243	0.0377471	0.0423252	0.0429387	1260.92
spring	N461116	female	throat	2	0.0208638	0.0230882	0.0252731	0.0265008	772.154
spring	N430154	female	throat	1	0.0288579	0.0326391	0.0367705	0.0400771	1124.15
spring	N430154	female	throat	2	0.0234442	0.0269476	0.0300218	0.0335634	928.006
spring	N430153	female	throat	1	0.0405898	0.0452899	0.0485072	0.0547697	1529.22
spring	N430153	female	throat	2	0.0285203	0.0324434	0.0355889	0.0392216	1101.69
spring	N430413	female	throat	1	0.018299	0.0197607	0.0222799	0.0250056	690.512
spring	N430413	female	throat	2	0.0234352	0.025083	0.027893	0.0322693	878.359
spring	N409801	female	throat	1	0.020022	0.0214618	0.0245493	0.0269924	752.333
spring	N409801	female	throat	2	0.0192325	0.0207714	0.0234904	0.0256683	720.734
spring	N384364	female	throat	1	0.0328369	0.0365779	0.0419172	0.0460536	1279.12
spring	N384364	female	throat	2	0.0318596	0.0341822	0.0390949	0.0413207	1182.43
spring	N430301	female	throat	1	0.0249041	0.0282606	0.032267	0.035397	983.801
spring	N430301	female	throat	2	0.0287007	0.0315717	0.0362533	0.0395387	1103.98
spring	N378358	female	throat	1	0.026216	0.0280158	0.0320851	0.0363985	993.643
spring	N378358	female	throat	2	0.0226422	0.0244419	0.0275099	0.0309494	853.838
spring	N461119	female	throat	1	0.0143164	0.0158601	0.0182231	0.0207201	562.404
spring	N461119	female	throat	2	0.0228032	0.0254156	0.0286659	0.0325283	889.195
spring	N409118	female	throat	1	0.0222543	0.028175	0.0335628	0.0387823	1018.57
spring	N409118	female	throat	2	0.0229799	0.0272875	0.0317213	0.0373565	981.691
spring	N409130	female	throat	1	0.0314259	0.0351331	0.0394006	0.0431629	1209.74
spring	N409130	female	throat	2	0.0352654	0.0379745	0.0420581	0.0436629	1278.7
spring	N409805	female	throat	1	0.0347007	0.0387299	0.0423256	0.0469713	1317.21
spring	N409805	female	throat	2	0.037132	0.0429459	0.0474235	0.0527302	1466.92
spring	N409298	female	throat	1	0.0180864	0.021224	0.0256279	0.0270796	755.071
spring	N409298	female	throat	2	0.0169221	0.0194822	0.0235153	0.0237025	683.254
spring	N461122	female	throat	1	0.0242578	0.0290853	0.0324884	0.0359651	996.491
spring	N461122	female	throat	2	0.0360402	0.0402853	0.0447359	0.0491917	1380.01
spring	N384362	female	throat	1	0.0365346	0.0430962	0.0490833	0.0537634	1492.19
spring	N384362	female	throat	2	0.0360085	0.0422694	0.0477553	0.0519312	1452.85
spring	N430386	female	throat	1	0.02876	0.0309051	0.0349403	0.0382511	1073.31
spring	N430386	female	throat	2	0.0317054	0.034924	0.0395719	0.0437348	1215.85
spring	N384102	female	throat	1	0.0372938	0.0432296	0.0480887	0.0525888	1475.18
spring	N384102	female	throat	2	0.0277169	0.0303471	0.0340539	0.0367067	1041.66
spring	N409807	female	breast	1	0.0284313	0.0319215	0.0341935	0.0330004	1024.71
spring	N409807	female	breast	2	0.0316434	0.0337882	0.0368655	0.0373772	1119.38
spring	N384389	female	breast	1	0.0171526	0.018539	0.0197987	0.0180502	586.225
spring	N384389	female	breast	2	0.0184684	0.019329	0.020165	0.0182235	602.91
spring	N384423	female	breast	1	0.0222549	0.0235069	0.0245373	0.0233306	743.632
spring	N384423	female	breast	2	0.018734	0.0199908	0.0203055	0.0188662	617.118
spring	N409827	female	breast	1	0.0280413	0.0279087	0.0295245	0.0295847	909.849
spring	N409827	female	breast	2	0.0183098	0.0208914	0.0233568	0.0242636	704.218
spring	N409646	female	breast	1	0.0262663	0.0277836	0.0310831	0.0324696	945.077
spring	N409646	female	breast	2	0.0241986	0.0238697	0.0271238	0.0277192	819.875
spring	N384053	female	breast	1	0.0673953	0.0679855	0.071772	0.07342	2224.54
spring	N384053	female	breast	2	0.0734802	0.0745816	0.0808488	0.0858857	2509.63
spring	N409850	female	breast	1	0.0329944	0.0362524	0.0402215	0.0431379	1232.8
spring	N409850	female	breast	2	0.0319449	0.0355302	0.0399555	0.042871	1217.71
spring	N384387	female	breast	1	0.0116979	0.0120723	0.0132022	0.0128977	397.274
spring	N384387	female	breast	2	0.0200436	0.0230735	0.023726	0.0231549	722.745
spring	N384345	female	breast	1	0.027895	0.0282086	0.0310422	0.0312528	942.53
spring	N384345	female	breast	2	0.0232274	0.024527	0.0275336	0.0283038	831.976
spring	N384370	female	breast	1	0.0289889	0.0310355	0.0316332	0.0294484	960.306
spring	N384370	female	breast	2	0.0262829	0.0307436	0.0316622	0.0292417	946.949
spring	N409215	female	breast	1	0.0266468	0.0285118	0.0313899	0.0308341	940.514
spring	N409215	female	breast	2	0.0230563	0.0253326	0.0284253	0.0277506	842.128
spring	N409806	female	breast	1	0.0245599	0.0288229	0.0298552	0.0280544	895.19
spring	N409806	female	breast	2	0.028828	0.0317614	0.0339324	0.0345018	1036.15
spring	N384478	female	breast	1	0.0225158	0.0242776	0.0270579	0.0270012	810.482
spring	N384478	female	breast	2	0.0167747	0.018876	0.0216699	0.0221589	644.812
spring	N461061	female	breast	1	0.0394244	0.0431756	0.0463623	0.049337	1434.47
spring	N461061	female	breast	2	0.0353594	0.0387495	0.0424234	0.0441593	1294.17
spring	N384368	female	breast	1	0.0304353	0.0317895	0.0338697	0.0330305	1027.38
spring	N384368	female	breast	2	0.0317505	0.0339079	0.0369049	0.0368106	1115.88
spring	N384379	female	breast	1	0.0206282	0.0217519	0.0251127	0.0247519	741.452
spring	N384379	female	breast	2	0.0259148	0.0275514	0.0273907	0.0253299	838.721
spring	N461116	female	breast	1	0.016476	0.0180755	0.0194608	0.0190016	585.431
spring	N461116	female	breast	2	0.0166499	0.0192791	0.0203575	0.0195406	610.593
spring	N430154	female	breast	1	0.0253203	0.0283137	0.0309251	0.0323058	943.548
spring	N430154	female	breast	2	0.0311546	0.0324019	0.0337894	0.0353265	1056.03
spring	N430153	female	breast	1	0.0262984	0.0307746	0.0314921	0.0308491	960.695
spring	N430153	female	breast	2	0.0253635	0.0279958	0.0291793	0.0288165	891.042
spring	N430413	female	breast	1	0.0182858	0.0200586	0.0215195	0.0234466	671.065
spring	N430413	female	breast	2	0.0176603	0.0192575	0.0210378	0.0219779	643.316
spring	N409801	female	breast	1	0.0145241	0.0162009	0.0168137	0.0176461	523.519
spring	N409801	female	breast	2	0.0199127	0.0216027	0.0226704	0.022908	696.527
spring	N384364	female	breast	1	0.0261221	0.0291434	0.0324215	0.0343334	987.313
spring	N384364	female	breast	2	0.0304915	0.0321118	0.0360167	0.0369464	1088.19
spring	N430301	female	breast	1	0.0291041	0.0300544	0.033487	0.0348049	1020.32
spring	N430301	female	breast	2	0.0403931	0.0414614	0.0452696	0.0477046	1396.41
spring	N378358	female	breast	1	0.016047	0.0174622	0.0196302	0.0199162	588.749
spring	N378358	female	breast	2	0.0165196	0.017704	0.0190726	0.0197956	585.912
spring	N461119	female	breast	1	0.0175051	0.0195985	0.023392	0.0262538	708.983
spring	N461119	female	breast	2	0.016212	0.0180107	0.0205004	0.0226402	628.271
spring	N409118	female	breast	1	0.018253	0.0194199	0.0214456	0.023285	663.011
spring	N409118	female	breast	2	0.0191181	0.0211098	0.0227262	0.0234606	695.185
spring	N409130	female	breast	1	0.0210485	0.0249469	0.0272839	0.025436	799.053
spring	N409130	female	breast	2	0.0242665	0.0278206	0.0312639	0.0285413	903.597
spring	N409805	female	breast	1	0.0351863	0.0385962	0.0417151	0.0427302	1271.88
spring	N409805	female	breast	2	0.0484642	0.0518814	0.0562539	0.0589816	1729.84
spring	N409298	female	breast	1	0.0147166	0.0162447	0.0175439	0.0137653	495.29
spring	N409298	female	breast	2	0.0200669	0.0230683	0.0250944	0.0230905	735.555
spring	N461122	female	breast	1	0.0238178	0.0259806	0.0283649	0.0293919	865.282
spring	N461122	female	breast	2	0.0269722	0.0290252	0.0317148	0.0333492	972.968
spring	N384362	female	breast	1	0.0167643	0.0192966	0.0220288	0.022213	652.552
spring	N384362	female	breast	2	0.0274465	0.0313161	0.0353535	0.0374863	1069.43
spring	N430386	female	breast	1	0.0174827	0.0187711	0.0213128	0.0210817	632.658
spring	N430386	female	breast	2	0.0242302	0.0265783	0.0281879	0.0279214	856.478
spring	N384102	female	breast	1	0.0314707	0.0354308	0.0392641	0.0425305	1205.28
spring	N384102	female	breast	2	0.0284248	0.0309703	0.0345477	0.0367	1054.37
spring	N409807	female	belly	1	0.0461414	0.0464668	0.0504358	0.0524075	1555.09
spring	N409807	female	belly	2	0.04277	0.0438726	0.0476151	0.0499147	1469.61
spring	N384389	female	belly	1	0.0323013	0.0325608	0.0354571	0.0362827	1086.58
spring	N384389	female	belly	2	0.0467328	0.0493803	0.0543446	0.0556945	1652.17
spring	N384423	female	belly	1	0.0354986	0.0358196	0.0414051	0.0430938	1248.51
spring	N384423	female	belly	2	0.0268127	0.0265048	0.0299663	0.0316479	916.859
spring	N409827	female	belly	1	0.02125	0.0213409	0.0246282	0.0251685	739.04
spring	N409827	female	belly	2	0.0181392	0.0193003	0.022168	0.0229968	665.922
spring	N409646	female	belly	1	0.0433596	0.0451365	0.0544304	0.0581275	1626.59
spring	N409646	female	belly	2	0.0512837	0.0540442	0.0656285	0.0710809	1963.84
spring	N384053	female	belly	1	0.0449772	0.0451753	0.0504239	0.0520056	1535.75
spring	N384053	female	belly	2	0.0453421	0.0447494	0.0514753	0.0521931	1545.22
spring	N409850	female	belly	1	0.0428472	0.0441684	0.0474416	0.048125	1454.02
spring	N409850	female	belly	2	0.0464281	0.0487123	0.052511	0.0540431	1611.75
spring	N384387	female	belly	1	0.0254165	0.0268299	0.0301233	0.0312256	912.643
spring	N384387	female	belly	2	0.0285733	0.0293226	0.0323079	0.0338539	991.543
spring	N384345	female	belly	1	0.030273	0.0304245	0.0349325	0.0371	1063.22
spring	N384345	female	belly	2	0.029098	0.029672	0.0329123	0.0346708	1010
spring	N384370	female	belly	1	0.0369791	0.0398701	0.0468459	0.047983	1388.75
spring	N384370	female	belly	2	0.0468178	0.0509285	0.0607811	0.0657925	1823.97
spring	N409215	female	belly	1	0.031338	0.0329824	0.0374805	0.0395268	1137.34
spring	N409215	female	belly	2	0.0313588	0.0331705	0.0374452	0.0402309	1145.35
spring	N409806	female	belly	1	0.0376239	0.0405386	0.0461522	0.0475752	1386.28
spring	N409806	female	belly	2	0.0390977	0.0430157	0.046721	0.0484799	1427.41
spring	N384478	female	belly	1	0.0242022	0.0257726	0.0322339	0.0349862	955.044
spring	N384478	female	belly	2	0.0255096	0.0269595	0.0326363	0.035035	974.432
spring	N461061	female	belly	1	0.0237771	0.0249806	0.0304349	0.0317951	899.007
spring	N461061	female	belly	2	0.0289166	0.0302394	0.0364718	0.0390911	1090.75
spring	N384368	female	belly	1	0.0241951	0.02636	0.0328753	0.0340774	958.013
spring	N384368	female	belly	2	0.0266305	0.0266848	0.0355985	0.0372251	1025.27
spring	N384379	female	belly	1	0.0160477	0.0190809	0.0246977	0.0292982	740.794
spring	N384379	female	belly	2	0.0182883	0.019239	0.0259717	0.0294173	763.316
spring	N461116	female	belly	1	0.026535	0.02869	0.0367342	0.0390224	1070.82
spring	N461116	female	belly	2	0.0238235	0.0254545	0.0343845	0.037377	994.394
spring	N430154	female	belly	1	0.0318343	0.0347109	0.0430916	0.0495941	1303.78
spring	N430154	female	belly	2	0.0300953	0.031971	0.0396735	0.0448416	1195.44
spring	N430153	female	belly	1	0.02242	0.0243017	0.0268932	0.027588	814.27
spring	N430153	female	belly	2	0.0257618	0.0275375	0.0314325	0.0332637	952.051
spring	N430413	female	belly	1	0.0346383	0.0351697	0.0397436	0.0430293	1222.96
spring	N430413	female	belly	2	0.0296776	0.0319357	0.0358719	0.0382024	1094.25
spring	N409801	female	belly	1	0.0259845	0.0281617	0.0313049	0.0340644	964.638
spring	N409801	female	belly	2	0.0238307	0.0251433	0.0287259	0.0312509	878.82
spring	N384364	female	belly	1	0.0352823	0.0374196	0.0422497	0.0428831	1268.36
spring	N384364	female	belly	2	0.028282	0.0285551	0.0311131	0.0322621	957.089
spring	N430301	female	belly	1	0.0305068	0.0317364	0.0401576	0.0437217	1188.95
spring	N430301	female	belly	2	0.0338602	0.0353192	0.0408992	0.0442091	1244.05
spring	N378358	female	belly	1	0.0301188	0.0320823	0.0382329	0.041764	1153.55
spring	N378358	female	belly	2	0.0295886	0.0303262	0.0358727	0.0392863	1089.75
spring	N461119	female	belly	1	0.0197187	0.0218766	0.0255808	0.0292114	785.926
spring	N461119	female	belly	2	0.0176429	0.0201546	0.0244717	0.0279989	741.346
spring	N409118	female	belly	1	0.0234627	0.0245351	0.0278639	0.0303834	855.581
spring	N409118	female	belly	2	0.0233498	0.0250117	0.0292838	0.0312758	881.718
spring	N409130	female	belly	1	0.0247774	0.0263092	0.0312666	0.0325796	929.729
spring	N409130	female	belly	2	0.0239369	0.0259185	0.03056	0.0320612	911.64
spring	N409805	female	belly	1	0.0618316	0.0614453	0.0619119	0.0622651	1946.33
spring	N409805	female	belly	2	0.0943748	0.0967326	0.0996182	0.100997	3103.06
spring	N409298	female	belly	1	0.0298973	0.0299643	0.0354424	0.0350427	1043.53
spring	N409298	female	belly	2	0.0196509	0.0211371	0.0254408	0.0250307	738.5
spring	N461122	female	belly	1	0.0330303	0.0360899	0.039555	0.0424856	1218.83
spring	N461122	female	belly	2	0.0316654	0.0339216	0.0359883	0.0385574	1123.14
spring	N384362	female	belly	1	0.0323248	0.0371147	0.0446599	0.0483659	1330.71
spring	N384362	female	belly	2	0.0295838	0.0334928	0.0381501	0.0414947	1161.01
spring	N430386	female	belly	1	0.0198486	0.021769	0.0246202	0.0249314	735.851
spring	N430386	female	belly	2	0.0187309	0.0192836	0.0220236	0.0228476	664.95
spring	N384102	female	belly	1	0.0274736	0.0291063	0.0322545	0.0340494	987.226
spring	N384102	female	belly	2	0.0313979	0.0331251	0.0365012	0.0373574	1108.88
